# Supplementary material for: Mechanochemical synthesis of poly(lactic acid) block copolymers: overcoming the miscibility of the macroinitiator, monomer and catalyst under solvent-free conditions
Source: Royal Society of Chemistry journal article supplement (doi:10.1039/c8py01520a), 2018-12-17

## Supplementary Information

### **Mechanochemical synthesis of poly(lactic Acid) block copolymers: overcoming the miscibility of the macroinitiator, monomer and catalyst under solvent-free conditions**

**Gue Seon Lee,<sup>a</sup> Bo Reum Moon,<sup>a</sup> Haemin Jeong,<sup>b,c</sup> Jihoon Shin<sup>\*b,c</sup>, Jeung Gon Kim<sup>\*a</sup>**

a. Department of Chemistry and Research Institute of Physics and Chemistry, Chonbuk National University, Jeonju 54896 Republic of Korea

b. Center for Environment & Sustainable Resources, Korea Research Institute of Chemical Technology, Yuseong-gu, Daejeon 34114, Republic of Korea

c. Department of Advanced Materials & Chemical Engineering, University of Science & Technology, Yuseong-gu, Daejeon 34113, Republic of Korea

|                                                                                       |           |
|---------------------------------------------------------------------------------------|-----------|
| <b>A. Raw data for Table 1 and Table 2</b>                                            | <b>S2</b> |
| <b>B. LAG effect experiments for PLA2000-PEO20000-PLA20000 synthesis</b>              | <b>S4</b> |
| <b>C. LAG effect experiments for PEO6000 initiator reactions</b>                      | <b>S5</b> |
| <b>D. Different Scanning Calorimeter Analysis of PLA10000-PEO20000-PLA10000</b>       | <b>S6</b> |
| <b>E. PEO recovery experiment after the degradation of PLA10000-PEO20000-PLA10000</b> | <b>S7</b> |
| <b>F. Reactor temperature measurement after the reaction</b>                          | <b>S8</b> |
| <b>G. GPC and NMR Spectra of table 1 and table 2</b>                                  | <b>S9</b> |

## A. Raw data for Table 1 and Table 2.

**Table S1.** Data of PLA-*b*-PEG-*b*-PLA Synthesis (table 1)<sup>a</sup>

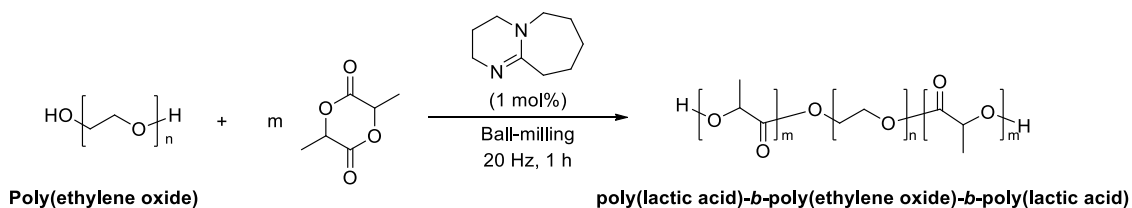

| Entry | Macroinitiator | Lactide (equiv) | Product (targeted)         | Conv (%) <sup>b</sup> | $M_n$ (kg/mol) <sup>c</sup> | $M_w/M_n$ <sup>c</sup> | Condition                         |
|-------|----------------|-----------------|----------------------------|-----------------------|-----------------------------|------------------------|-----------------------------------|
| 1-1   | PEO1000        | 14              | PLA1000-PEO1000-PLA1000    | 93                    | 2.78                        | 1.25                   | 7 mm ball x 3 ea                  |
| 1-2   |                |                 |                            | 99                    | 3.32                        | 1.18                   |                                   |
| 2-1   | PEO1000        | 28              | PLA2000-PEO1000-PLA2000    | 99                    | 4.64                        | 1.30                   | 7 mm ball x 3 ea                  |
| 2-2   |                |                 |                            | >99                   | 4.59                        | 1.28                   |                                   |
| 3-1   | PEO1000        | 42              | PLA3000-PEO1000-PLA3000    | 97                    | 6.76                        | 1.29                   | 7 mm ball x 3 ea                  |
| 3-2   |                |                 |                            | 98                    | 6.90                        | 1.40                   |                                   |
| 4-1   | PEO6000        | 42              | PLA3000-PEO6000-PLA3000    | >99                   | 14.5                        | 1.22                   | 12 mm ball x 1 ea, THF 20 $\mu$ L |
| 4-2   |                |                 |                            | >99                   | 14.7                        | 1.18                   |                                   |
| 5-1   | PEO6000        | 83              | PLA6000-PEO6000-PLA6000    | >99                   | 17.7                        | 1.33                   | 12 mm ball x 1 ea                 |
| 5-2   |                |                 |                            | >99                   | 18.1                        | 1.33                   |                                   |
| 6-1   | PEO6000        | 125             | PLA9000-PEO6000-PLA9000    | >99                   | 21.2                        | 1.48                   | 12 mm ball x 1 ea                 |
| 6-2   |                |                 |                            | >99                   | 21.1                        | 1.46                   |                                   |
| 7-1   | PEO6000        | 167             | PLA12000-PEO6000-PLA12000  | >99                   | 20.1                        | 1.67                   | 12 mm ball x 1 ea                 |
| 7-2   |                |                 |                            | >99                   | 19.7                        | 1.64                   |                                   |
| 8-1   | PEO6000        | 167             | PLA12000-PEO6000-PLA12000  | >99                   | 25.4                        | 1.47                   | 12 mm ball x 1 ea, THF 20 $\mu$ L |
| 8-2   |                |                 |                            | >99                   | 26.0                        | 1.47                   |                                   |
| 9-1   | PEO20000       | 69              | PLA5000-PEO20000-PLA5000   | >99                   | 20.8                        | 1.13                   | 12 mm ball x 1 ea                 |
| 9-2   |                |                 |                            | >99                   | 20.4                        | 1.13                   |                                   |
| 10-1  | PEO20000       | 139             | PLA10000-PEO20000-PLA10000 | >99                   | 24.5                        | 1.18                   | 12mm ball x 1 ea                  |
| 10-2  |                |                 |                            | >99                   | 23.3                        | 1.23                   |                                   |
| 11-1  | PEO20000       | 278             | PLA20000-PEO20000-PLA20000 | >99                   | 32.0                        | 1.23                   | 12mm ball x 1 ea                  |
| 11-2  |                |                 |                            | >99                   | 29.4                        | 1.21                   |                                   |

a. Polymerization conditions: D-lactide (100 mg), DBU (1.0  $\mu$ L), and PEO in a 25 mL stainless-steel jar with stainless-steel balls; b. Determined by <sup>1</sup>H-NMR spectroscopy; c. Determined by GPC calibrated with polystyrene standards in tetrahydrofuran (THF) at 40 °C.

**Table S2.** Data of PLA block copolymer from various macroinitiators (table 2)<sup>a</sup>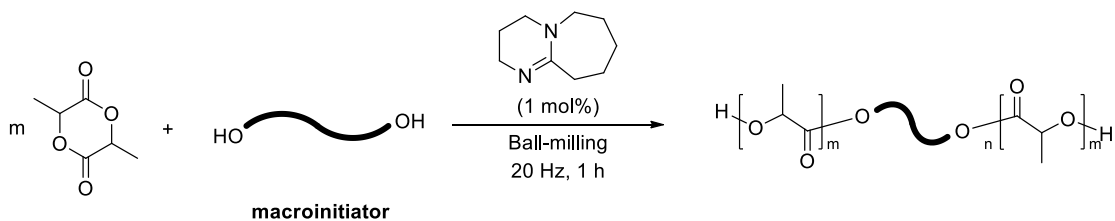

| Entry | Macroinitiator        | Lactide (equiv) | Product (targeted)                  | Conv (%) <sup>b</sup> | $M_n$ (kg/mol) <sup>c</sup> | $M_w/M_n$ <sup>c</sup> | Condition                        |
|-------|-----------------------|-----------------|-------------------------------------|-----------------------|-----------------------------|------------------------|----------------------------------|
| 1-1   | HO-P $\epsilon$ DL-OH | 56              | PLA4000-P $\epsilon$ DL4600-PLA4000 | 98                    | 10.8                        | 1.53                   | 7 mm ball x 3 ea, THF 20 $\mu$ L |
| 1-2   |                       |                 |                                     | 85                    | 9.04                        | 1.50                   |                                  |
| 2-1   | HO-P $\delta$ DL-OH   | 56              | PLA4000-P $\delta$ DL4400-PLA4000   | 92                    | 11.3                        | 1.41                   | 7 mm ball x 3 ea                 |
| 2-2   |                       |                 |                                     | 84                    | 10.1                        | 1.41                   |                                  |
| 3-1   | P $\epsilon$ CL-OH    | 56              | P $\epsilon$ CL4800-PLA4000         | 95                    | 12.1                        | 1.21                   | 7 mm ball x 3 ea, THF 20 $\mu$ L |
| 3-2   |                       |                 |                                     | 83                    | 10.5                        | 1.20                   |                                  |
| 4-1   | PTHF                  | 28              | PLA2000-PTHF2900-PLA2000            | 89                    | 8.81                        | 1.53                   | 7 mm ball x 3 ea                 |
| 4-2   |                       |                 |                                     | 98                    | 8.97                        | 1.57                   |                                  |
| 5-1   |                       |                 |                                     | 56                    | PLA4000-PTHF2900-PLA4000    | 74                     |                                  |
| 5-2   | 92                    | 13.4            | 1.35                                |                       |                             |                        |                                  |

a. Polymerization conditions: D-lactide (100 mg), DBU (1.0  $\mu$ L), and macroinitiator in a 25 mL stainless-steel jar with stainless-steel balls; b. Determined by <sup>1</sup>H-NMR spectroscopy; c. Determined by GPC calibrated with polystyrene standards in tetrahydrofuran (THF) at 40 °C.

## B. LAG effect experiments for PLA20000-PEO20000-PLA20000 synthesis

Table S3. LAG effect tests on chain degradation protection.

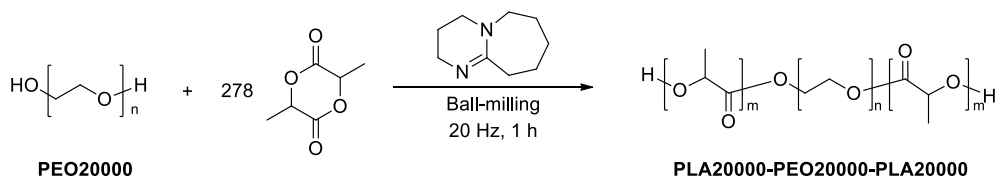

| Entry | LAG (equiv)   | Conv (%) <sup>c</sup> | $M_n$<br>(kg/mol) <sup>d</sup> | $M_w/M_n$ <sup>d</sup> |
|-------|---------------|-----------------------|--------------------------------|------------------------|
| 1-1   | Toluene 20 uL | >99                   | 32.0                           | 1.23                   |
| 1-2   |               | >99                   | 29.4                           | 1.21                   |
| 2-1   | THF 20 uL     | >99                   | 24.7                           | 1.23                   |
| 2-2   |               | >99                   | 25.0                           | 1.21                   |
| 3-1   | DME 20 uL     | >99                   | 25.3                           | 1.20                   |
| 3-2   |               | >99                   | 24.4                           | 1.25                   |

a. Polymerization conditions: D-lactide (100 mg), DBU (1.0 uL), and PEO in a 25 mL stainless-steel jar with stainless-steel balls; b. Determined by <sup>1</sup>H-NMR spectroscopy; c. Determined by GPC calibrated with poly-styrene standards in tetrahydrofuran (THF) at 40 °C.

C. LAG effect experiments for PEO6000 initiator reactions.

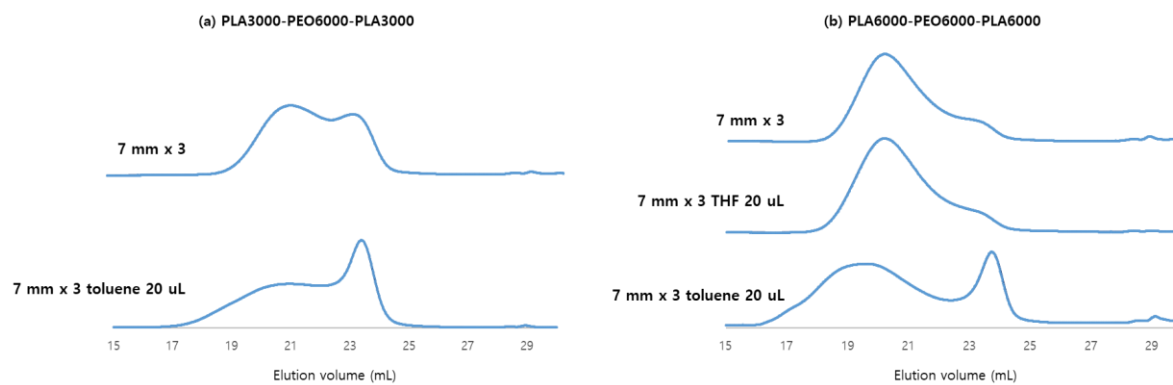

Figure S1. GPC spectra of liquid-additive effect tests on PEO6000 initiated lactide polymerization.

D. Different Scanning Calorimeter Analysis of PLA10000-PEO20000-PLA10000 (Table 1, entry 10).

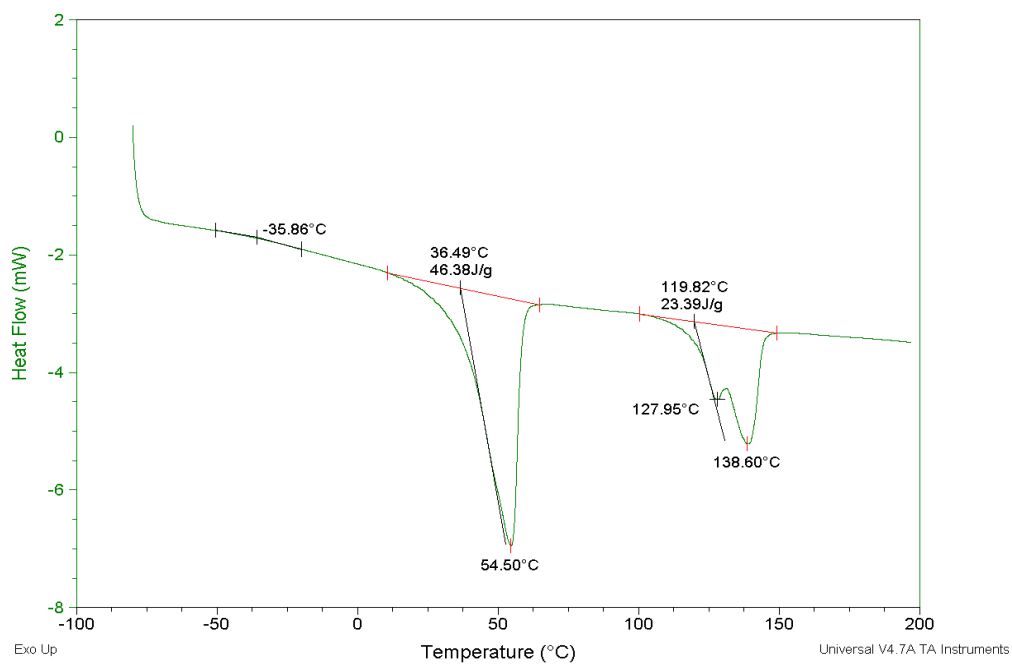

Figure S2. DSC spectra of liquid-additive effect tests on PEO20000 initiated lactide polymerization.

**E. PEO recovery experiment after the degradation of PLA10000-PEO20000-PLA10000 (entry 10)**

In a 4 mL vial, 1 M NaOH solution (MeOH, 0.2 mL) was added to the solution of PLA10000-PEO20000-PLA10000 (Table 1, entry 10) (10 mg) in THF (1 mL). The resulting solution was placed on 40 °C heating block. After 1 h, the complete degradation of PLA was confirmed by <sup>1</sup>H-NMR and an aliquot was taken for GPC analysis of the resulting PEO (Figure S3, top). The authentic PEO was dissolved in the mixture of THF (1 mL) and 1 M NaOH (MeOH, 0.2 mL), then an aliquot was subjected to GPC analysis (Figure S3, bottom).

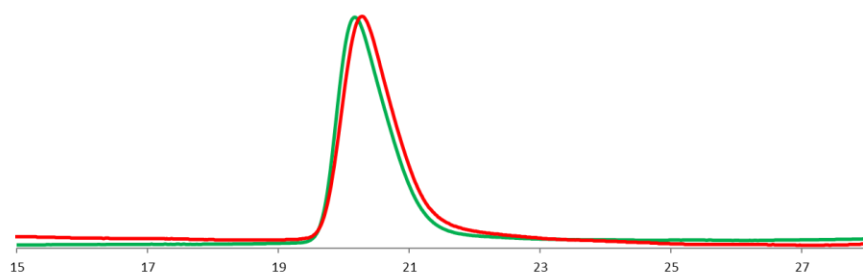

**Figure S3.** GPC spectra of the recovered PEO20000 after PLA10000-PEO20000-PLA10000 degradation (red) and the authentic PEO20000 (green).

#### F. Reactor temperature measurement after the reaction.

The temperature of the reaction was measured after immediate opening of the vessel by visual IR thermometer. The highest temperature 43.5 °C was recorded at the milling ball location.

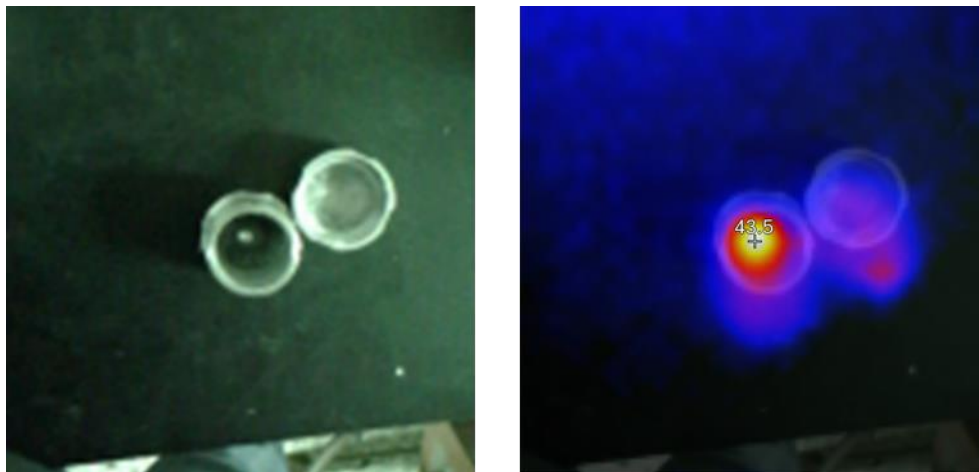

**Figure S4.** Visual IR thermometer images of the reaction vessel after the reaction.



### G. GPC and NMR Spectra of table 1 and table 2

Table 1, entry 1-1

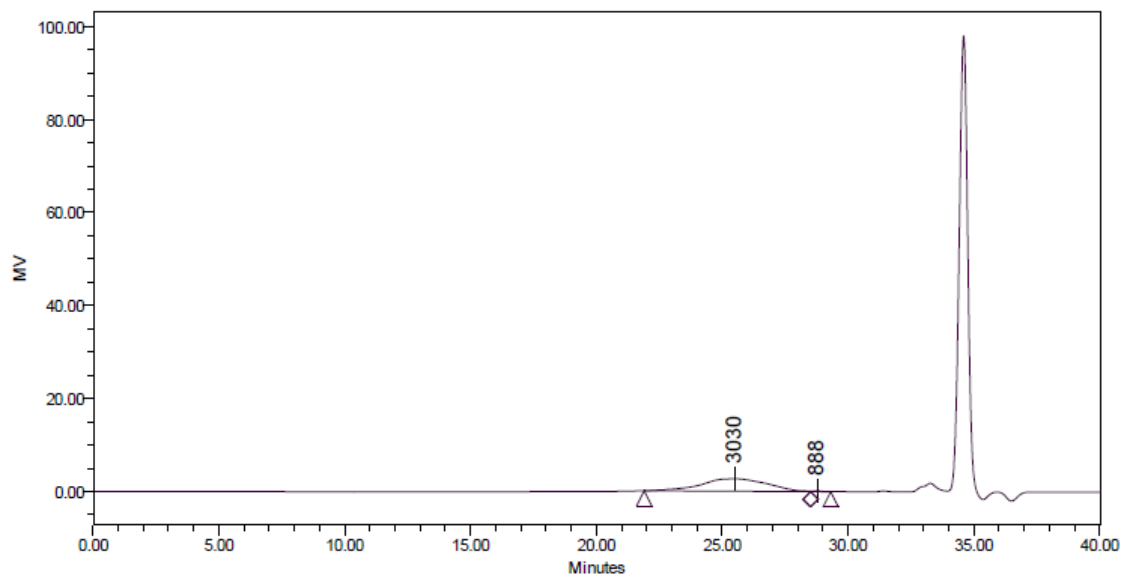

**Broad Unknown Relative Peak Table**

| Distribution Name | Mn (Daltons) | Mw (Daltons) | MP (Daltons) | Mz (Daltons) | Mz+1 (Daltons) | Polydispersity | Mz/Mw    | Mz+1/Mw  |
|-------------------|--------------|--------------|--------------|--------------|----------------|----------------|----------|----------|
| 1                 | 2784         | 3503         | 3030         | 4505         | 5756           | 1.258623       | 1.285842 | 1.643037 |
| 2                 | 880          | 883          | 888          | 886          | 889            | 1.003379       | 1.003294 | 1.006515 |

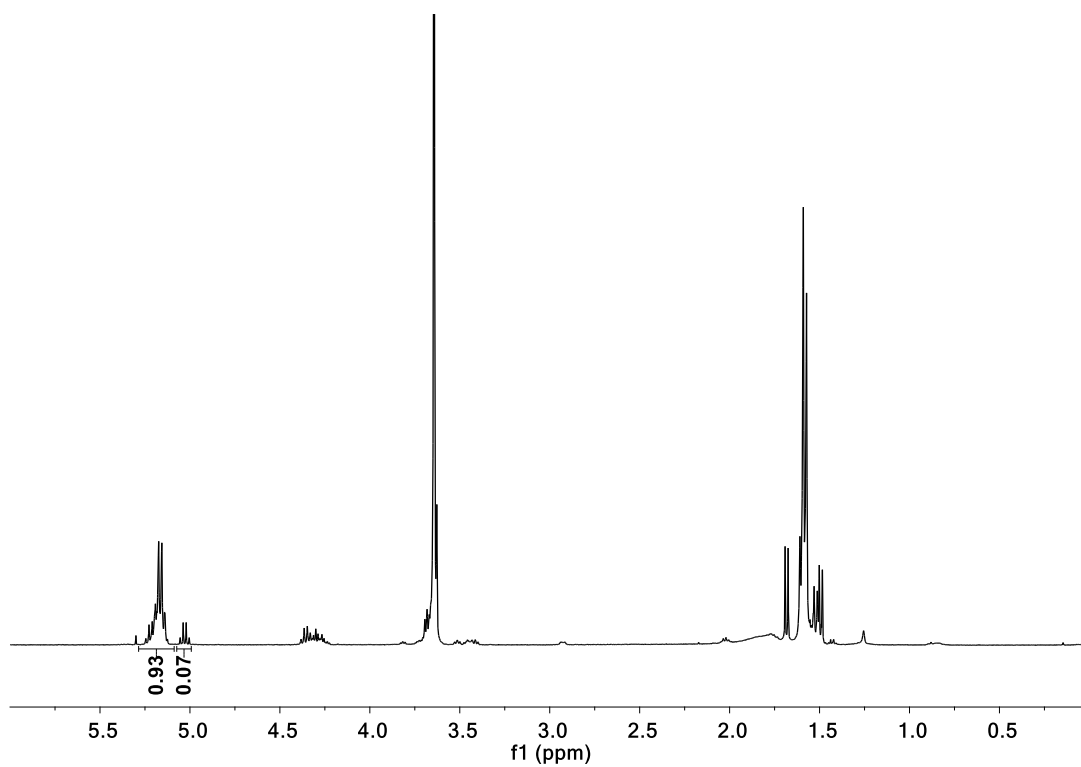

Table 1 entry 1-2

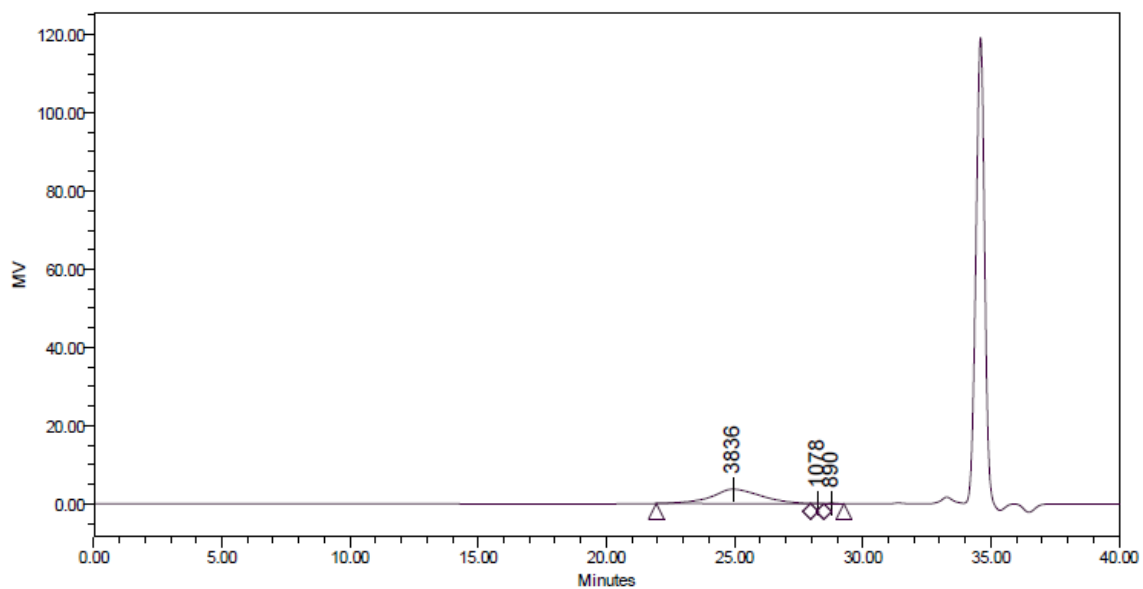

Broad Unknown Relative Peak Table

|   | Distribution Name | Mn (Daltons) | Mw (Daltons) | MP (Daltons) | Mz (Daltons) | Mz+1 (Daltons) | Polydispersity | Mz/Mw    | Mz+1/Mw  |
|---|-------------------|--------------|--------------|--------------|--------------|----------------|----------------|----------|----------|
| 1 |                   | 3319         | 3927         | 3836         | 4689         | 5622           | 1.183137       | 1.193981 | 1.431702 |
| 2 |                   | 1095         | 1097         | 1078         | 1100         | 1103           | 1.002643       | 1.002619 | 1.005212 |

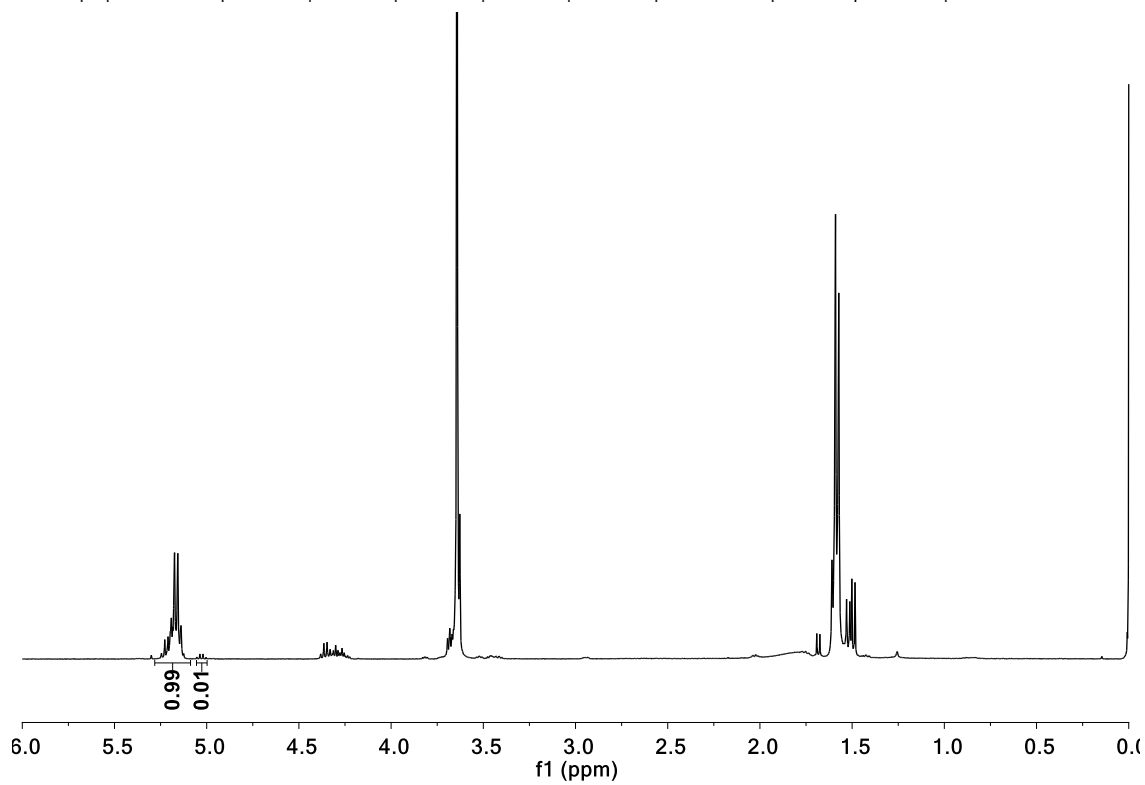

Table 1 entry 2-1

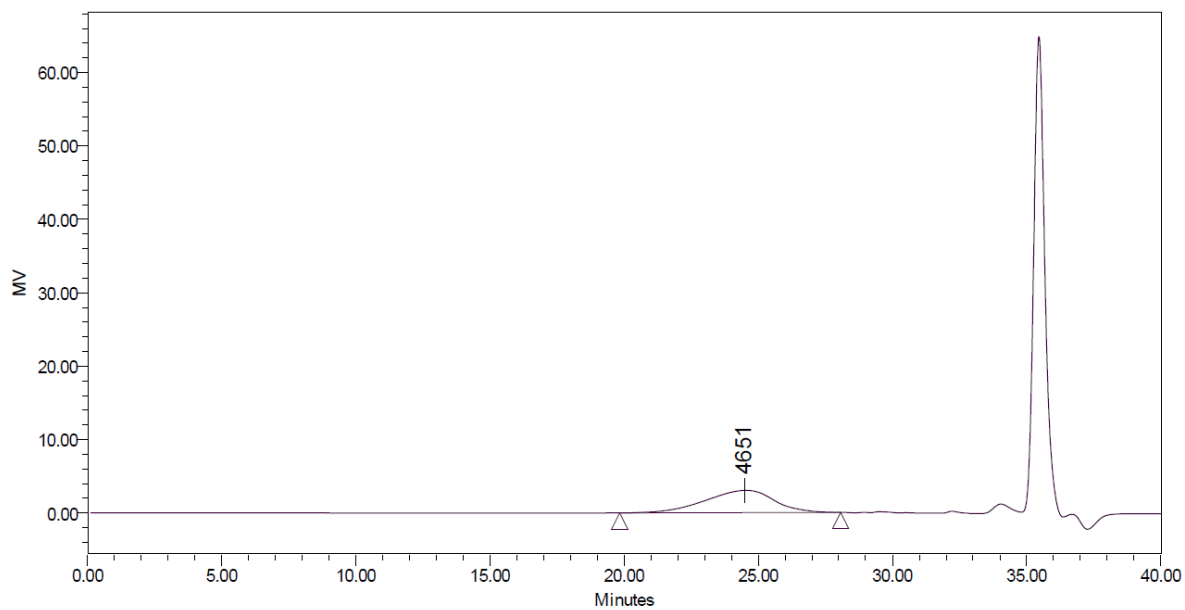

Broad Unknown Relative Peak Table

| Distribution Name | Mn (Daltons) | Mw (Daltons) | MP (Daltons) | Mz (Daltons) | Mz+1 (Daltons) | Polydispersity | Mz/Mw    | Mz+1/Mw  |
|-------------------|--------------|--------------|--------------|--------------|----------------|----------------|----------|----------|
| 1                 | 4635         | 6063         | 4651         | 8124         | 10800          | 1.308173       | 1.339950 | 1.781216 |

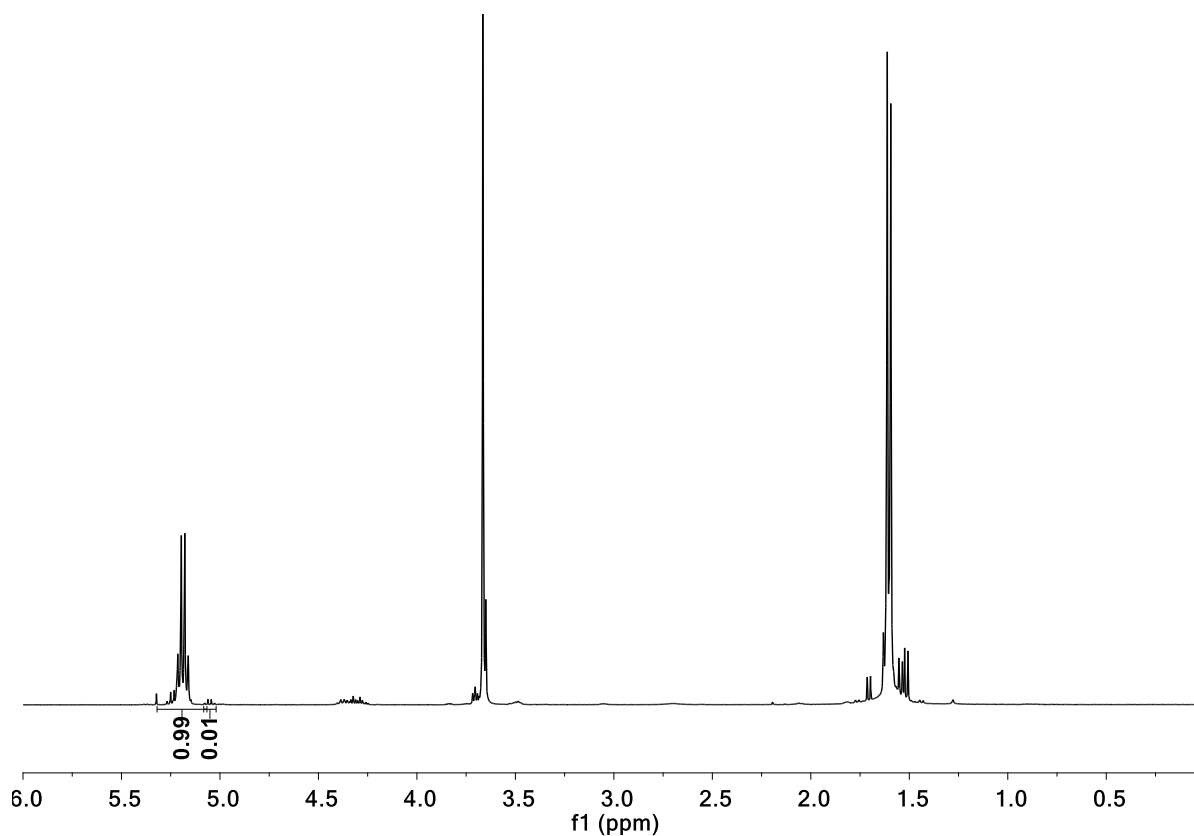

Table 1 entry 2-2

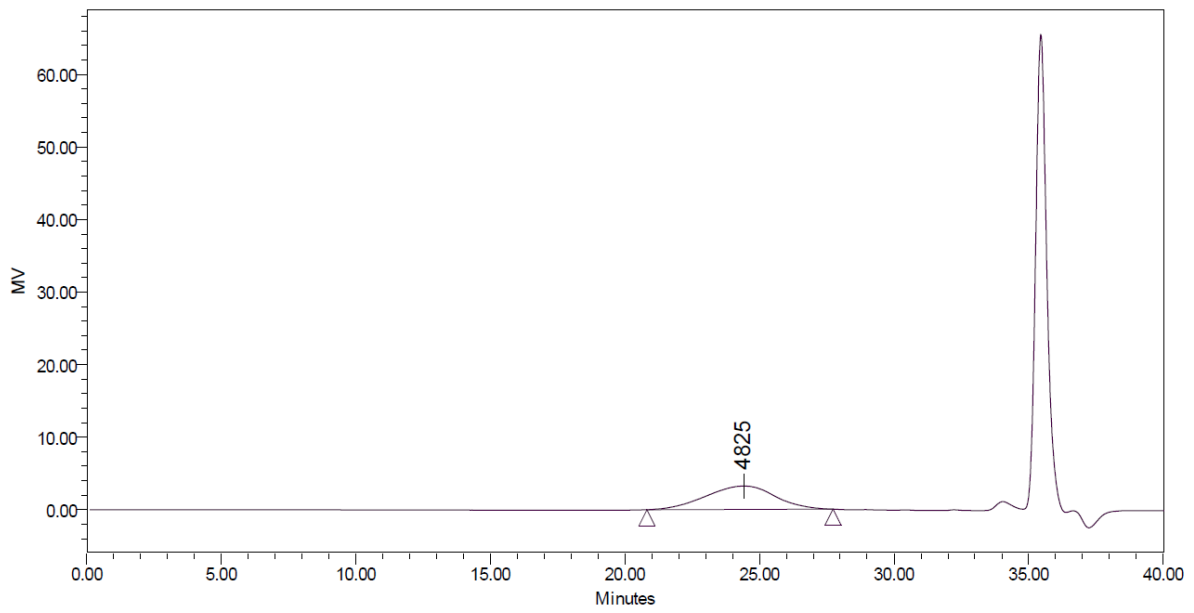

Broad Unknown Relative Peak Table

| Distribution Name | Mn (Daltons) | Mw (Daltons) | MP (Daltons) | Mz (Daltons) | Mz+1 (Daltons) | Polydispersity | Mz/Mw    | Mz+1/Mw  |
|-------------------|--------------|--------------|--------------|--------------|----------------|----------------|----------|----------|
| 1                 | 4592         | 5875         | 4825         | 7506         | 9333           | 1.279471       | 1.277517 | 1.588474 |

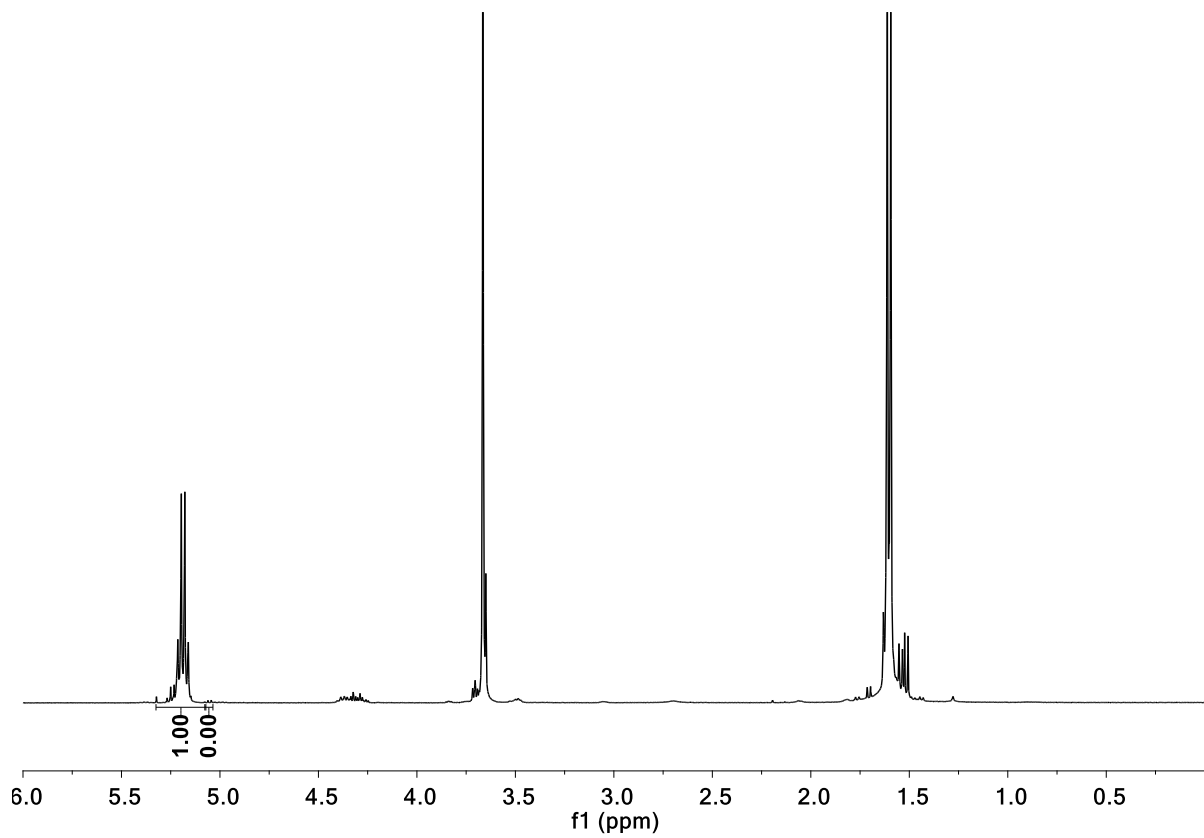

Table 1 entry 3-1

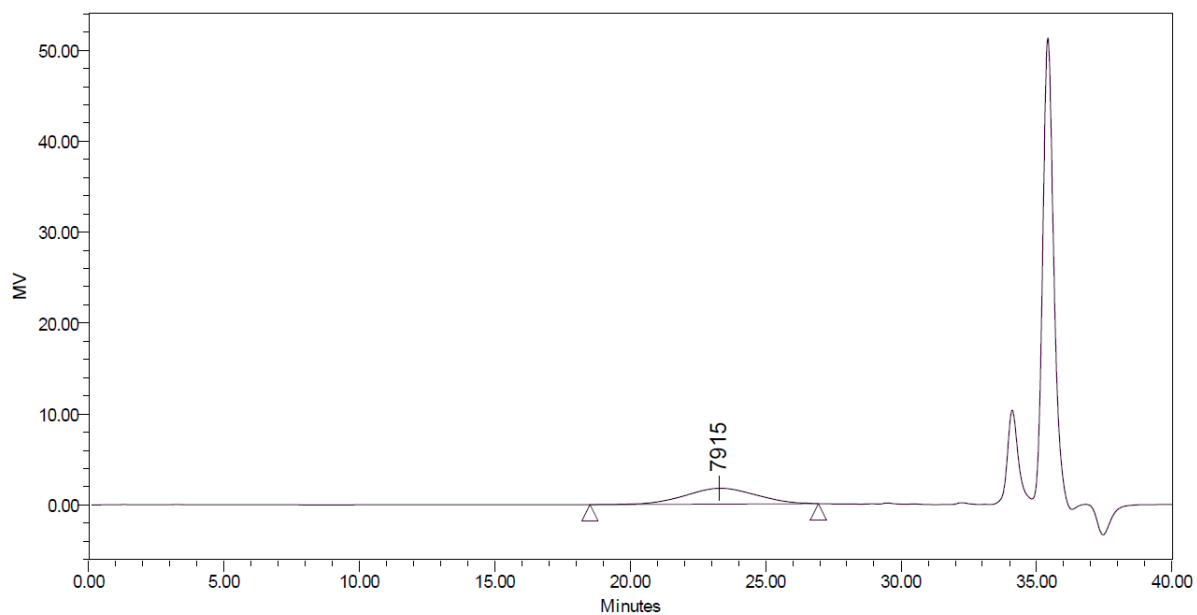

Broad Unknown Relative Peak Table

| Distribution Name | Mn (Daltons) | Mw (Daltons) | MP (Daltons) | Mz (Daltons) | Mz+1 (Daltons) | Polydispersity | Mz/Mw    | Mz+1/Mw  |
|-------------------|--------------|--------------|--------------|--------------|----------------|----------------|----------|----------|
| 1                 | 6759         | 8817         | 7915         | 11402        | 14418          | 1.304433       | 1.293184 | 1.635148 |

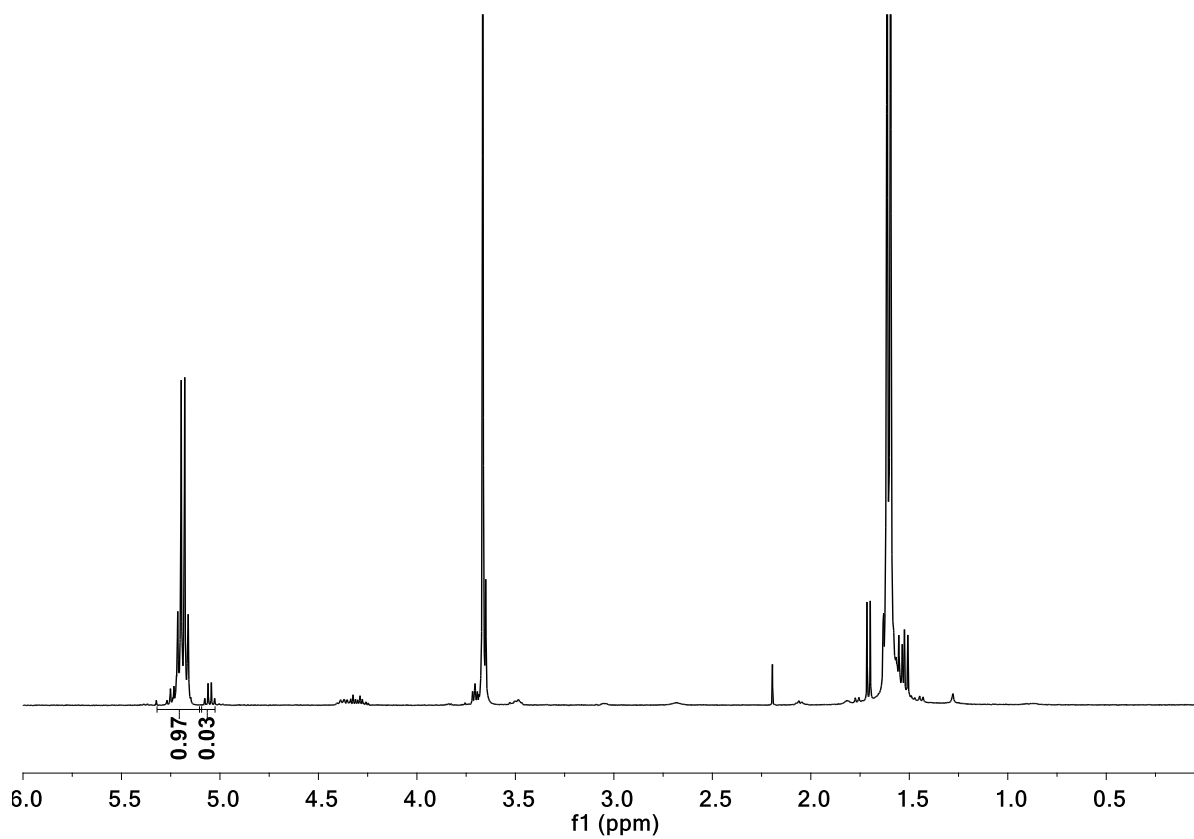

Table 1 entry 3-2

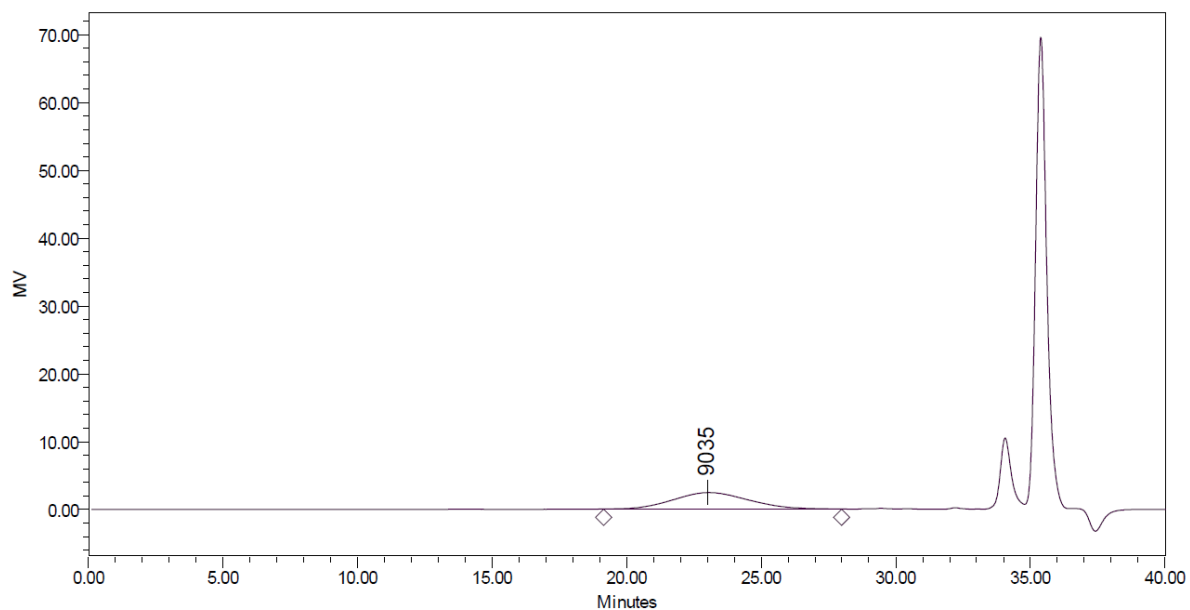

Broad Unknown Relative Peak Table

|   | Distribution Name | Mn (Daltons) | Mw (Daltons) | MP (Daltons) | Mz (Daltons) | Mz+1 (Daltons) | Polydispersity | Mz/Mw    | Mz+1/Mw  |
|---|-------------------|--------------|--------------|--------------|--------------|----------------|----------------|----------|----------|
| 1 |                   | 6895         | 9638         | 9035         | 12902        | 16580          | 1.397715       | 1.338694 | 1.720351 |

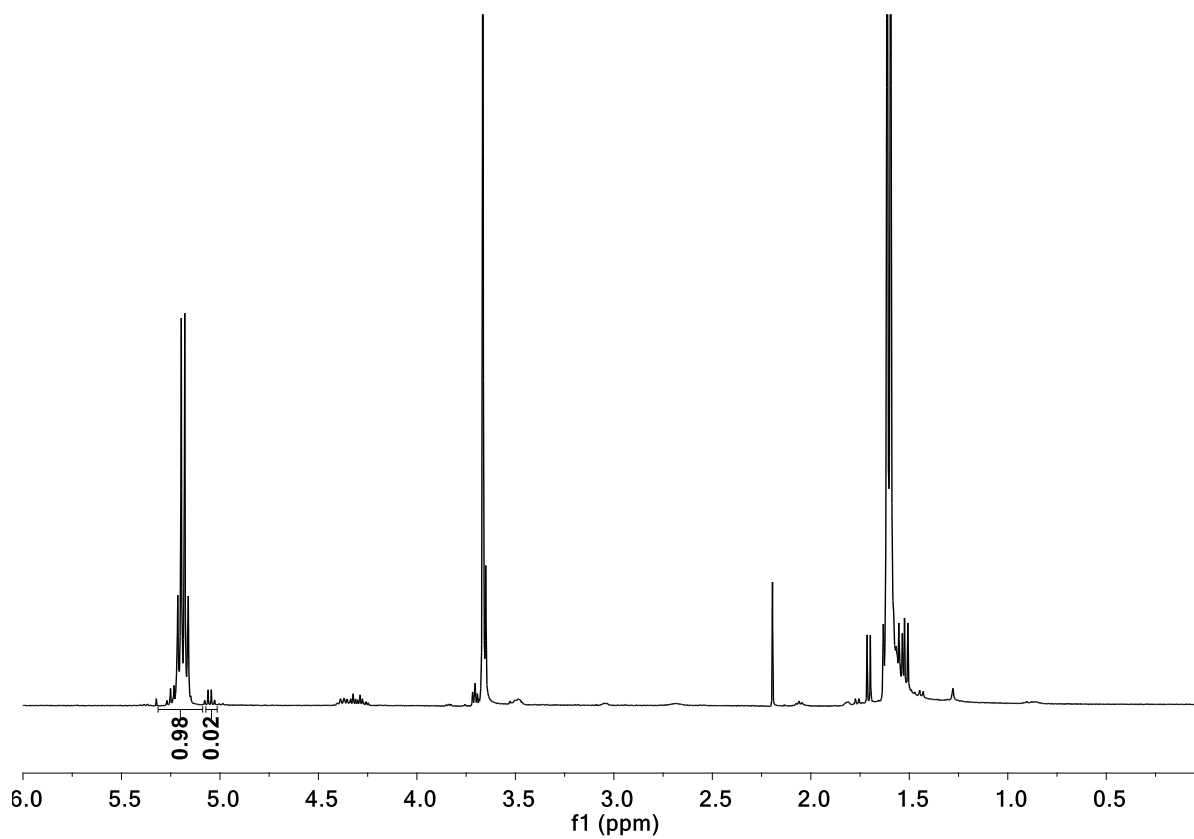

Table 1 entry 4-1

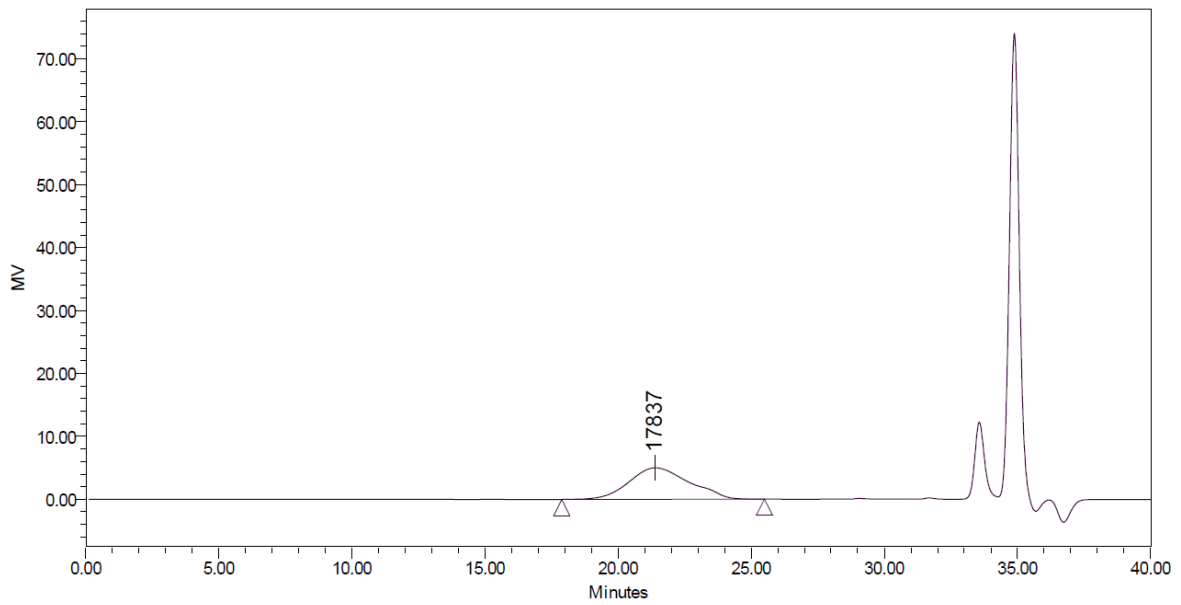

Broad Unknown Relative Peak Table

| Distribution Name | Mn (Daltons) | Mw (Daltons) | MP (Daltons) | Mz (Daltons) | Mz+1 (Daltons) | Polydispersity | Mz/Mw    | Mz+1/Mw  |
|-------------------|--------------|--------------|--------------|--------------|----------------|----------------|----------|----------|
| 1                 | 14519        | 17686        | 17837        | 21151        | 24958          | 1.218087       | 1.195920 | 1.411175 |

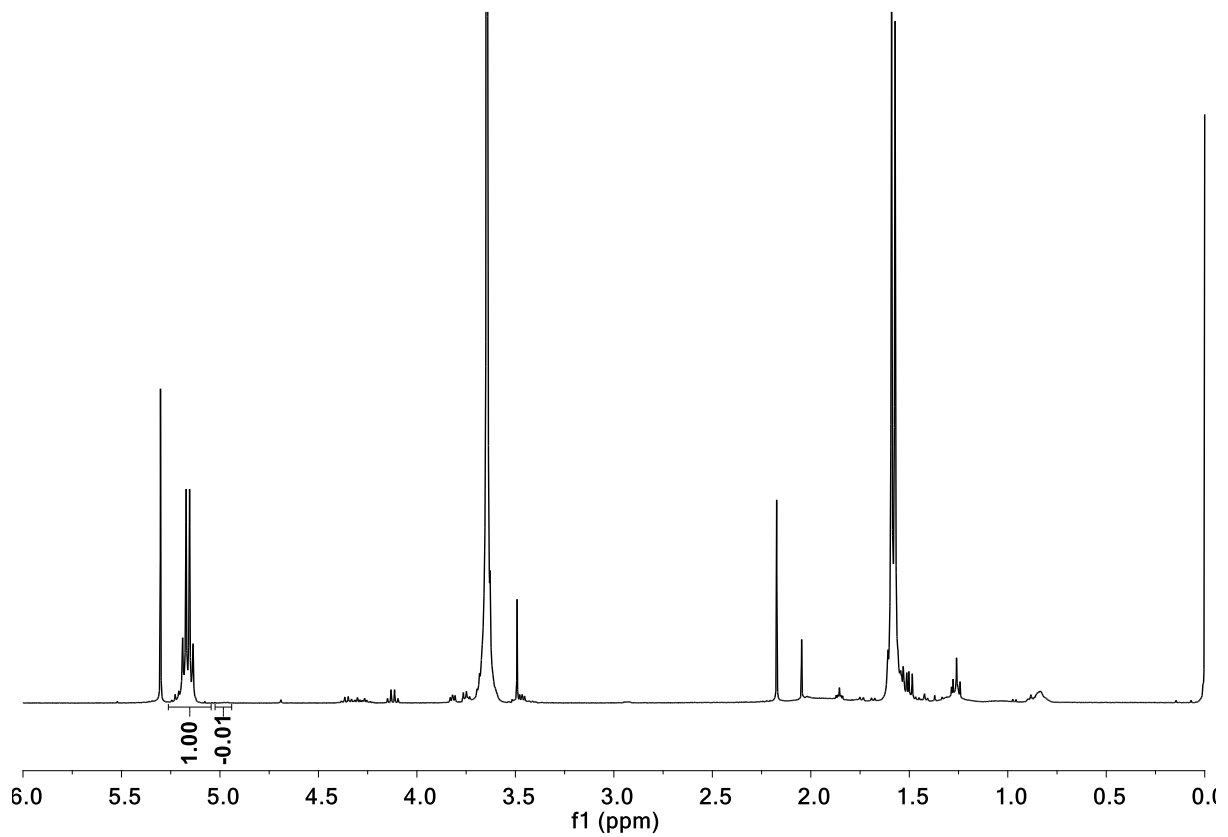

Table 1 entry 4-2

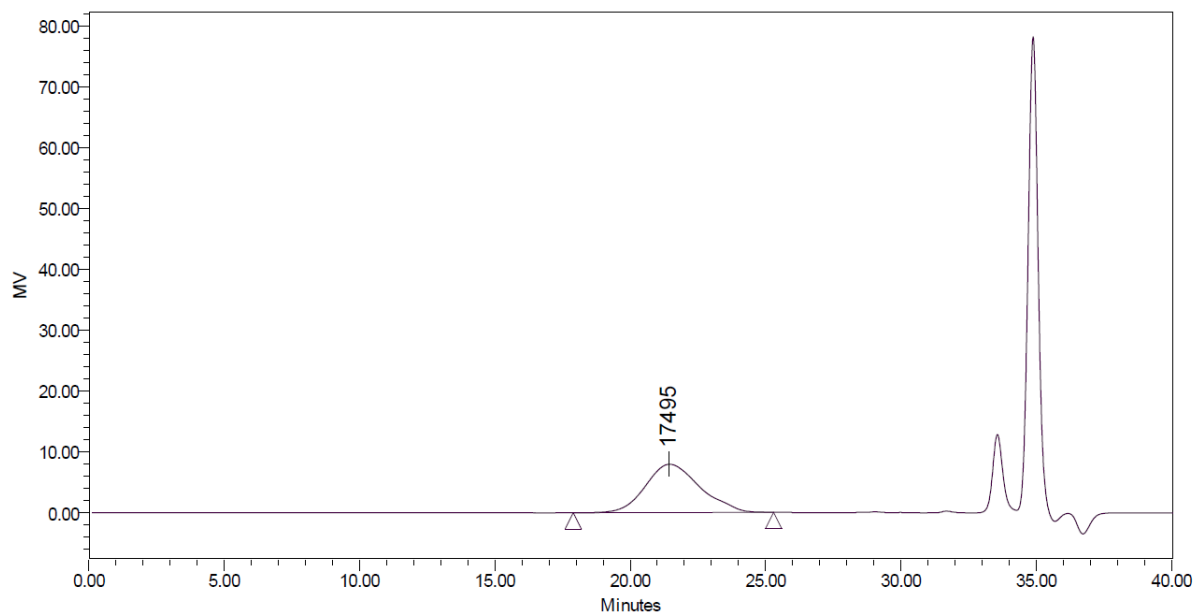

Broad Unknown Relative Peak Table

| Distribution Name | Mn (Daltons) | Mw (Daltons) | MP (Daltons) | Mz (Daltons) | Mz+1 (Daltons) | Polydispersity | Mz/Mw    | Mz+1/Mw  |
|-------------------|--------------|--------------|--------------|--------------|----------------|----------------|----------|----------|
| 1                 | 14658        | 17240        | 17495        | 19938        | 22833          | 1.176171       | 1.156484 | 1.324416 |

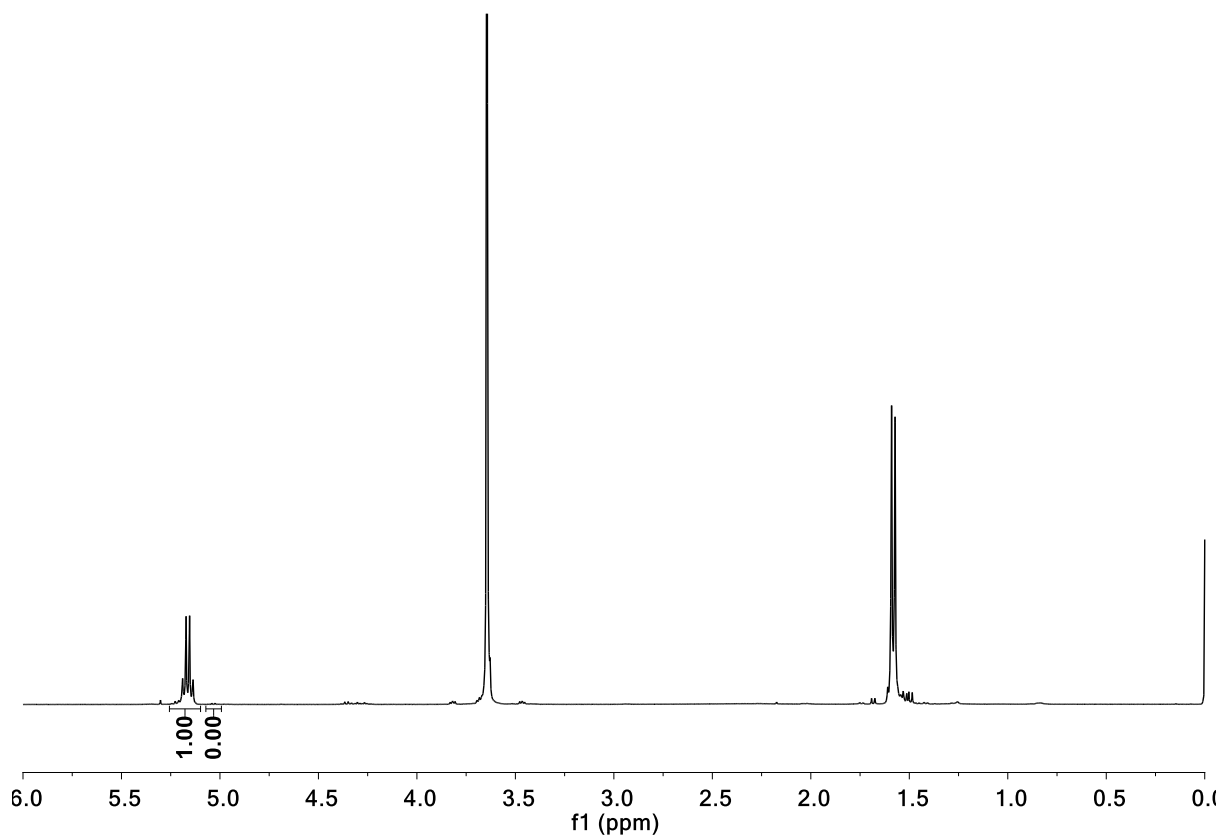



Table 1 entry 5-1

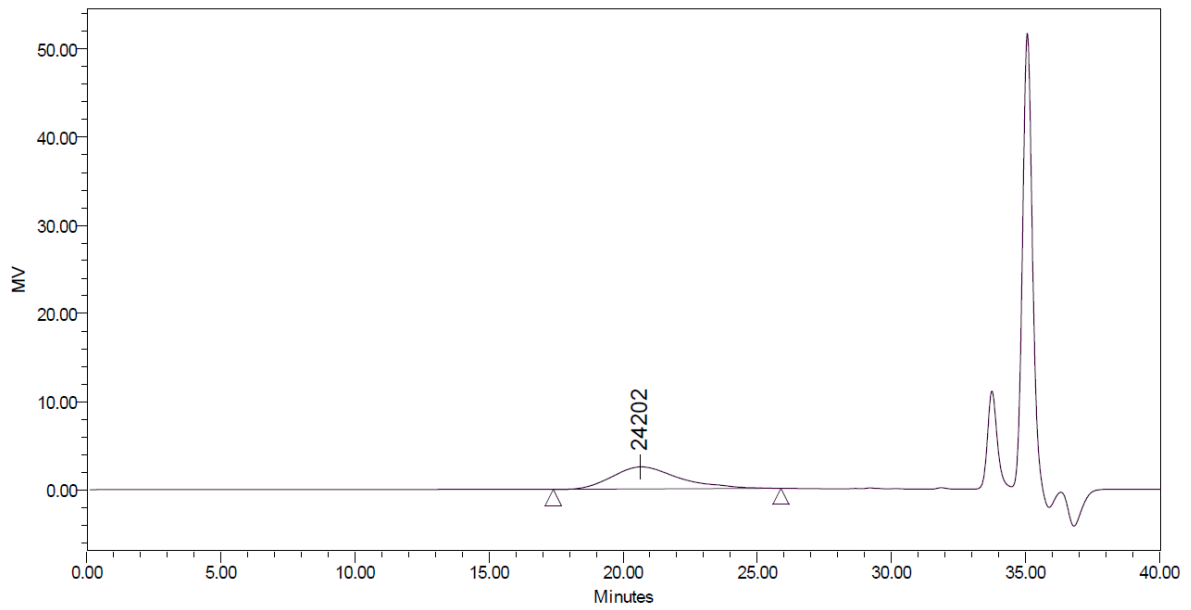

Broad Unknown Relative Peak Table

| Distribution Name | Mn (Daltons) | Mw (Daltons) | MP (Daltons) | Mz (Daltons) | Mz+1 (Daltons) | Polydispersity | Mz/Mw    | Mz+1/Mw  |
|-------------------|--------------|--------------|--------------|--------------|----------------|----------------|----------|----------|
| 1                 | 17654        | 23457        | 24202        | 29032        | 34518          | 1.328726       | 1.237686 | 1.471546 |

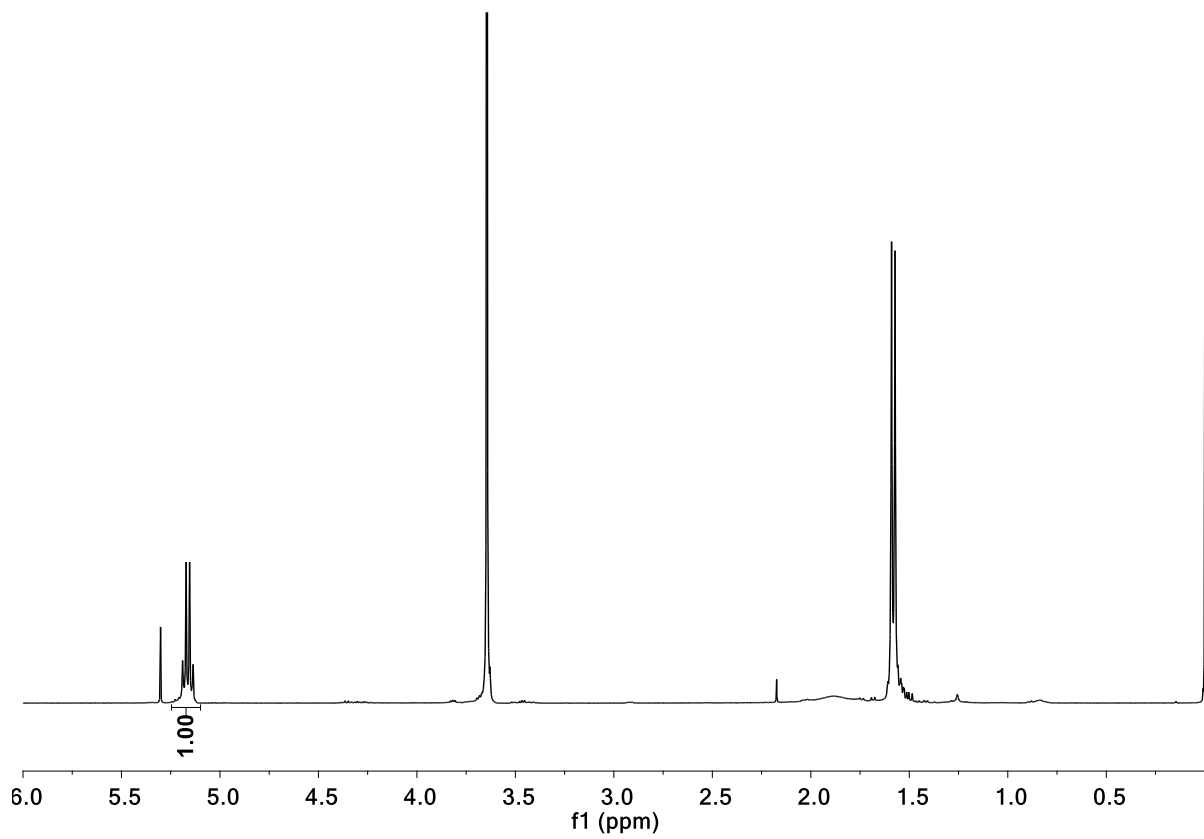

Table 1 entry 5-2

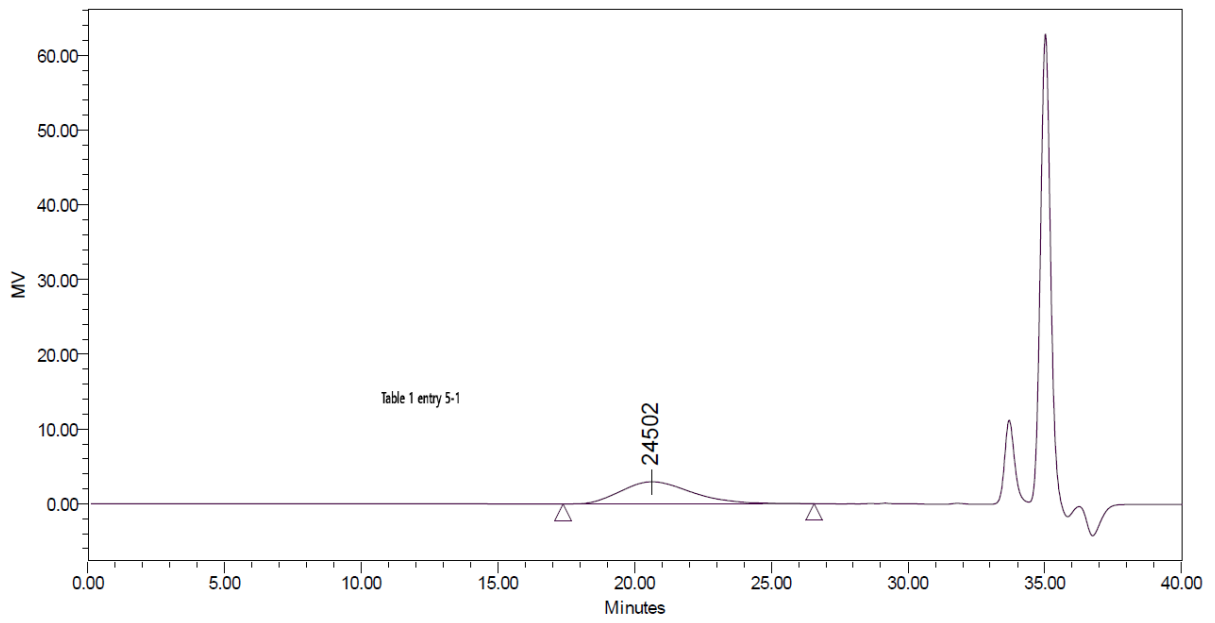

Broad Unknown Relative Peak Table

|   | Distribution Name | Mn (Daltons) | Mw (Daltons) | MP (Daltons) | Mz (Daltons) | Mz+1 (Daltons) | Polydispersity | Mz/Mw    | Mz+1/Mw  |
|---|-------------------|--------------|--------------|--------------|--------------|----------------|----------------|----------|----------|
| 1 |                   | 18116        | 24185        | 24502        | 30027        | 35835          | 1.334755       | 1.241544 | 1.481702 |

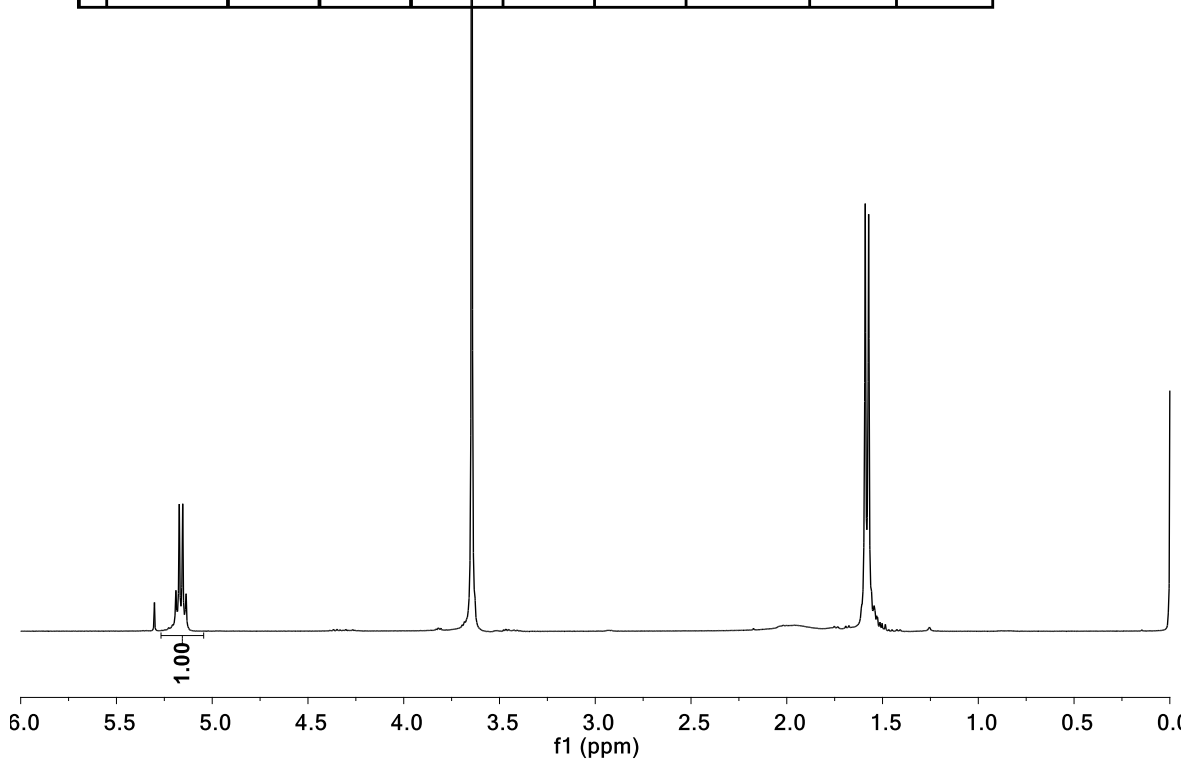

Table 1 entry 6-1

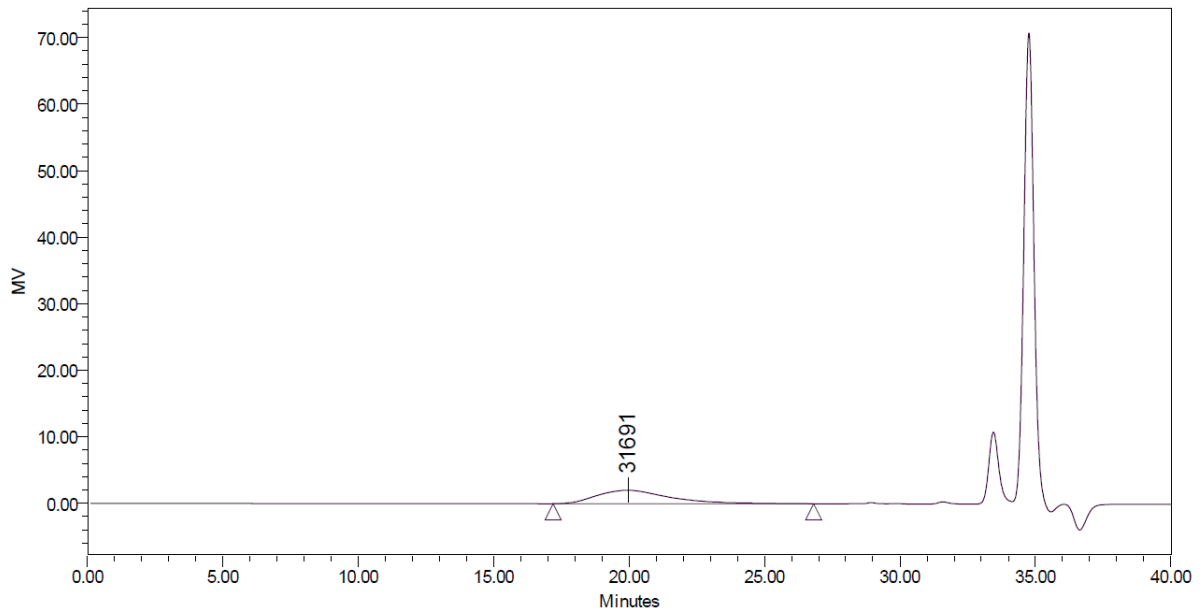

Broad Unknown Relative Peak Table

| Distribution Name | Mn (Daltons) | Mw (Daltons) | MP (Daltons) | Mz (Daltons) | Mz+1 (Daltons) | Polydispersity | Mz/Mw    | Mz+1/Mw  |
|-------------------|--------------|--------------|--------------|--------------|----------------|----------------|----------|----------|
| 1                 | 21180        | 31356        | 31691        | 40616        | 49880          | 1.480433       | 1.295324 | 1.590751 |

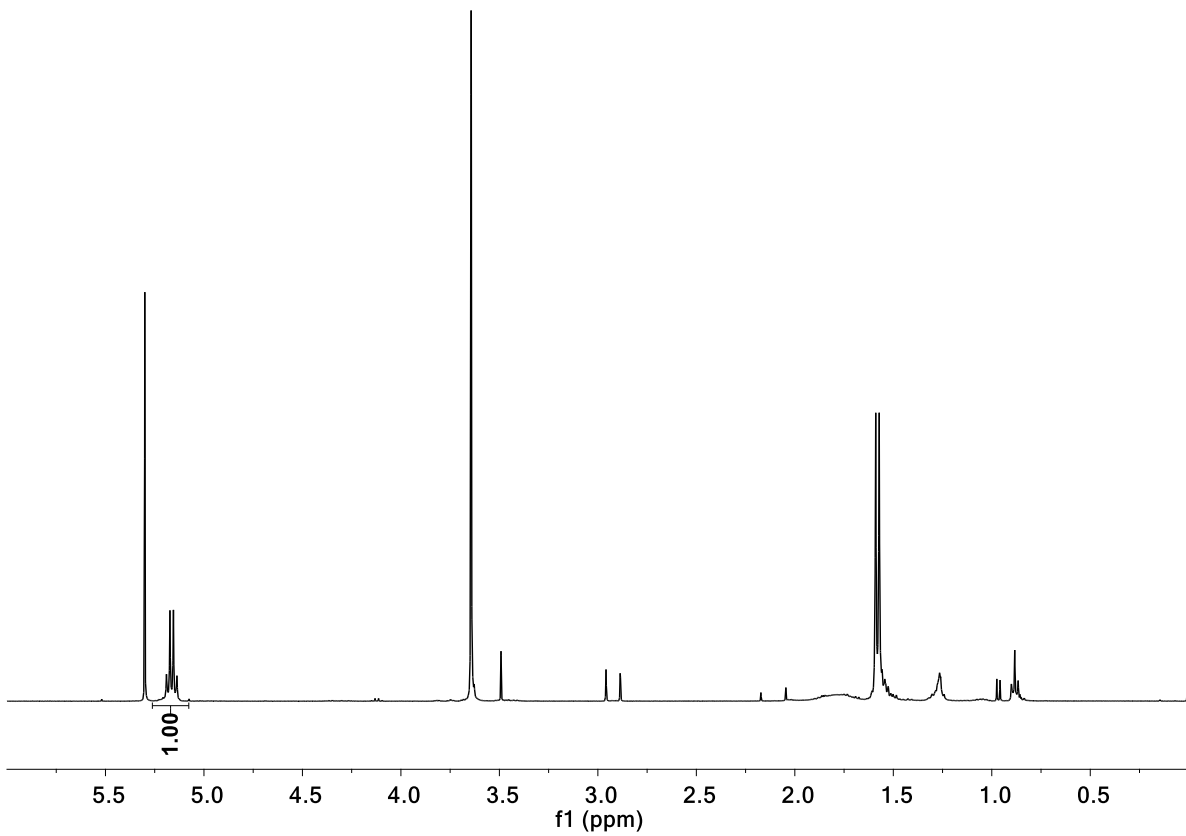

Table 1 entry 6-2

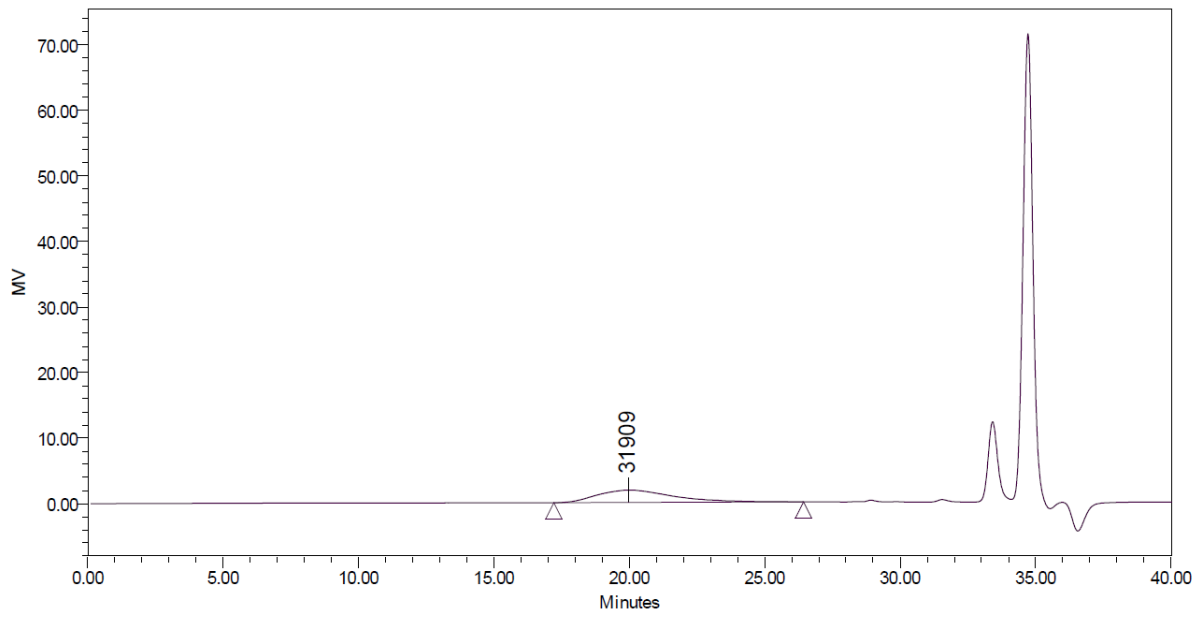

Broad Unknown Relative Peak Table

| Distribution Name | Mn (Daltons) | Mw (Daltons) | MP (Daltons) | Mz (Daltons) | Mz+1 (Daltons) | Polydispersity | Mz/Mw    | Mz+1/Mw  |
|-------------------|--------------|--------------|--------------|--------------|----------------|----------------|----------|----------|
| 1                 | 21152        | 30782        | 31909        | 39936        | 49009          | 1.455250       | 1.297404 | 1.592148 |

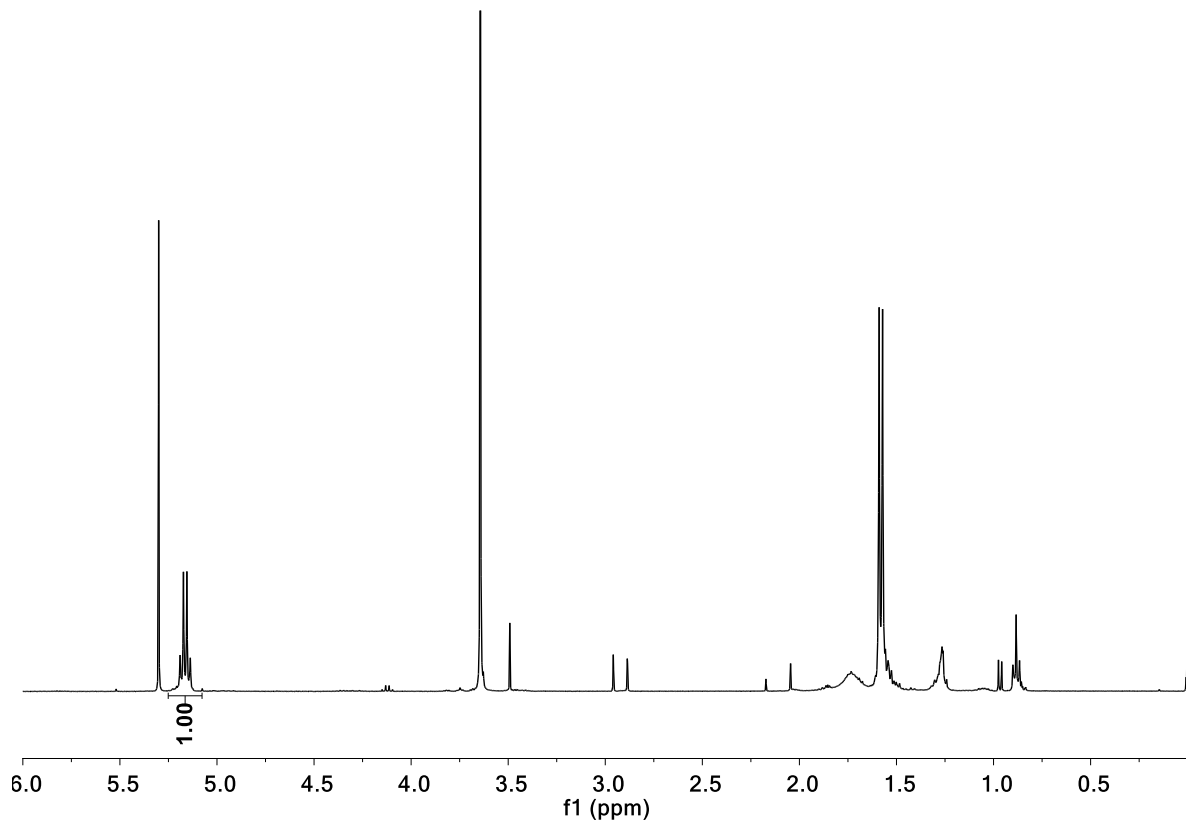

Table 1 entry 7-1

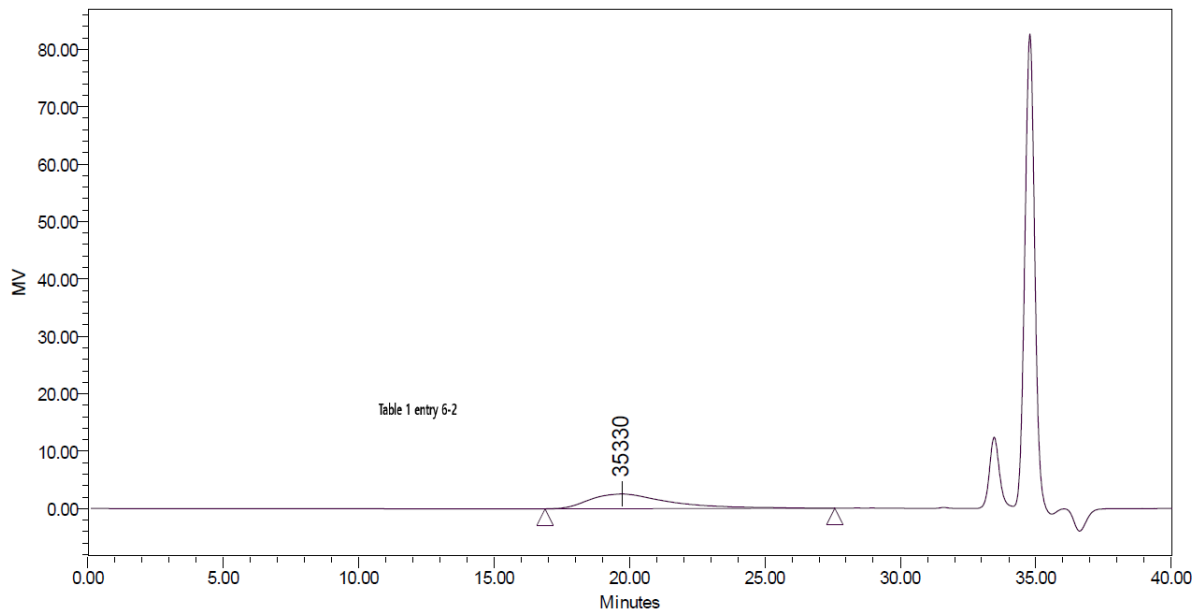

Broad Unknown Relative Peak Table

| Distribution Name | Mn (Daltons) | Mw (Daltons) | MP (Daltons) | Mz (Daltons) | Mz+1 (Daltons) | Polydispersity | Mz/Mw    | Mz+1/Mw  |
|-------------------|--------------|--------------|--------------|--------------|----------------|----------------|----------|----------|
| 1                 | 20079        | 33579        | 35330        | 45400        | 56935          | 1.672342       | 1.352024 | 1.695541 |

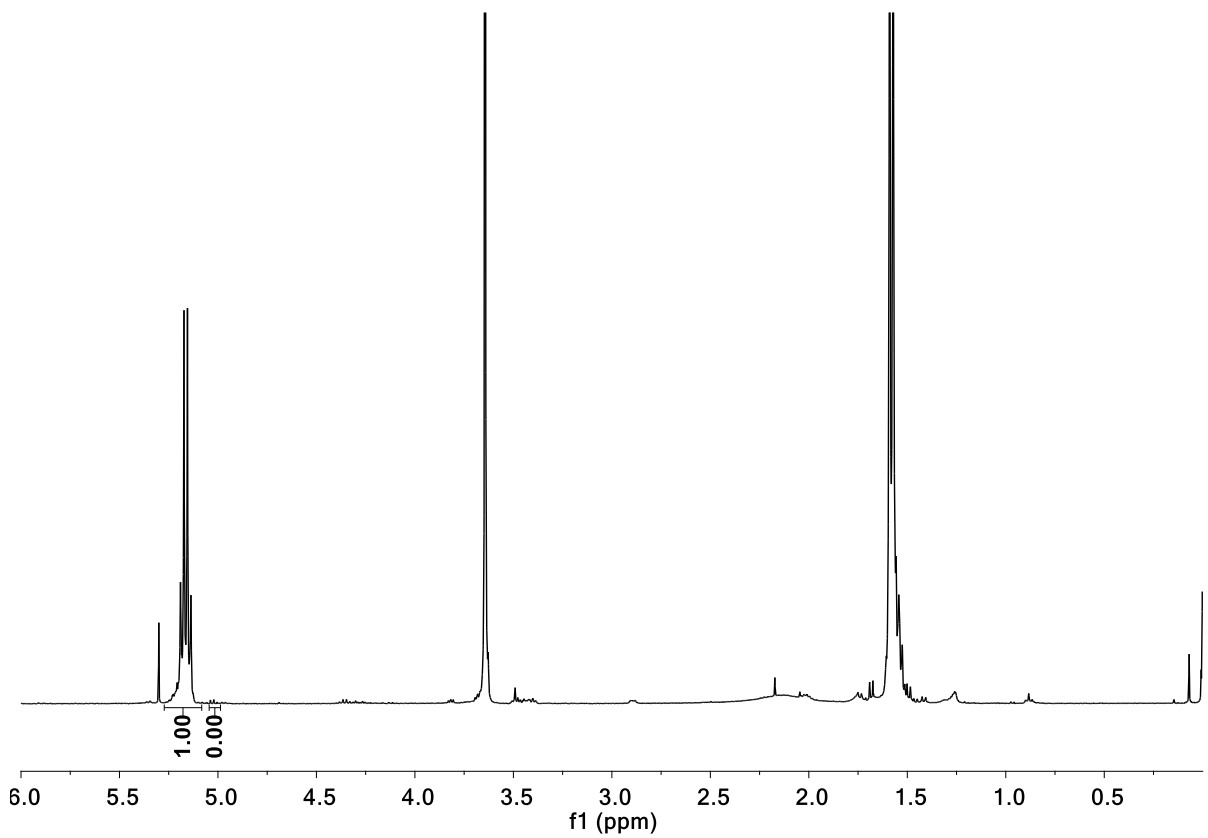

Table 1 entry 7-2

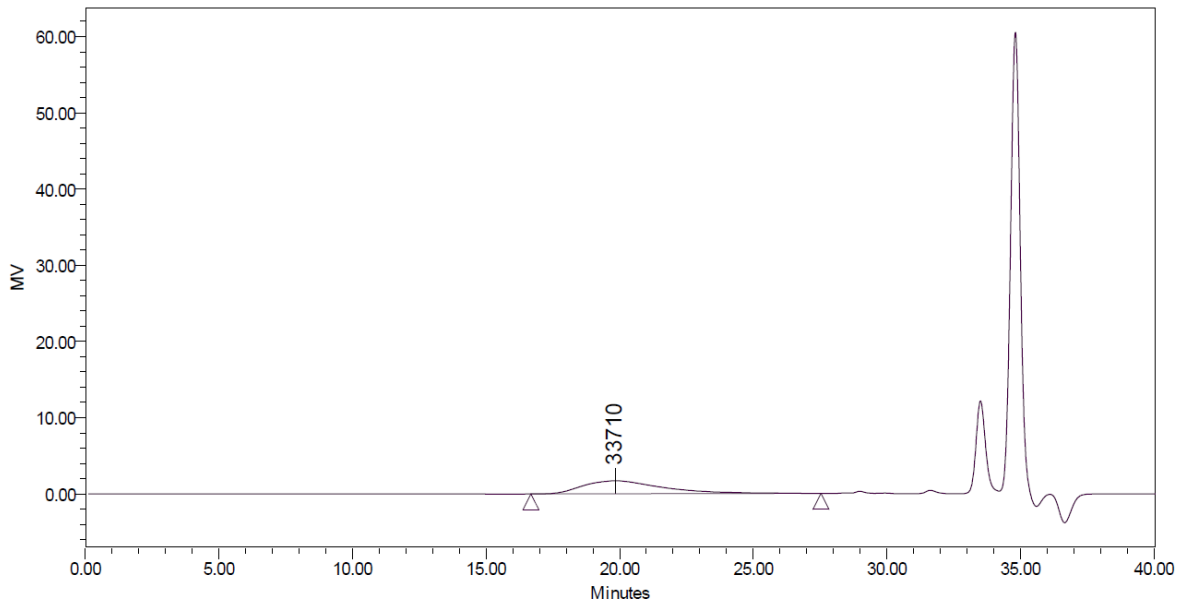

Broad Unknown Relative Peak Table

| Distribution Name | Mn (Daltons) | Mw (Daltons) | MP (Daltons) | Mz (Daltons) | Mz+1 (Daltons) | Polydispersity | Mz/Mw    | Mz+1/Mw  |
|-------------------|--------------|--------------|--------------|--------------|----------------|----------------|----------|----------|
| 1                 | 19673        | 32176        | 33710        | 43557        | 54827          | 1.635586       | 1.353704 | 1.703939 |

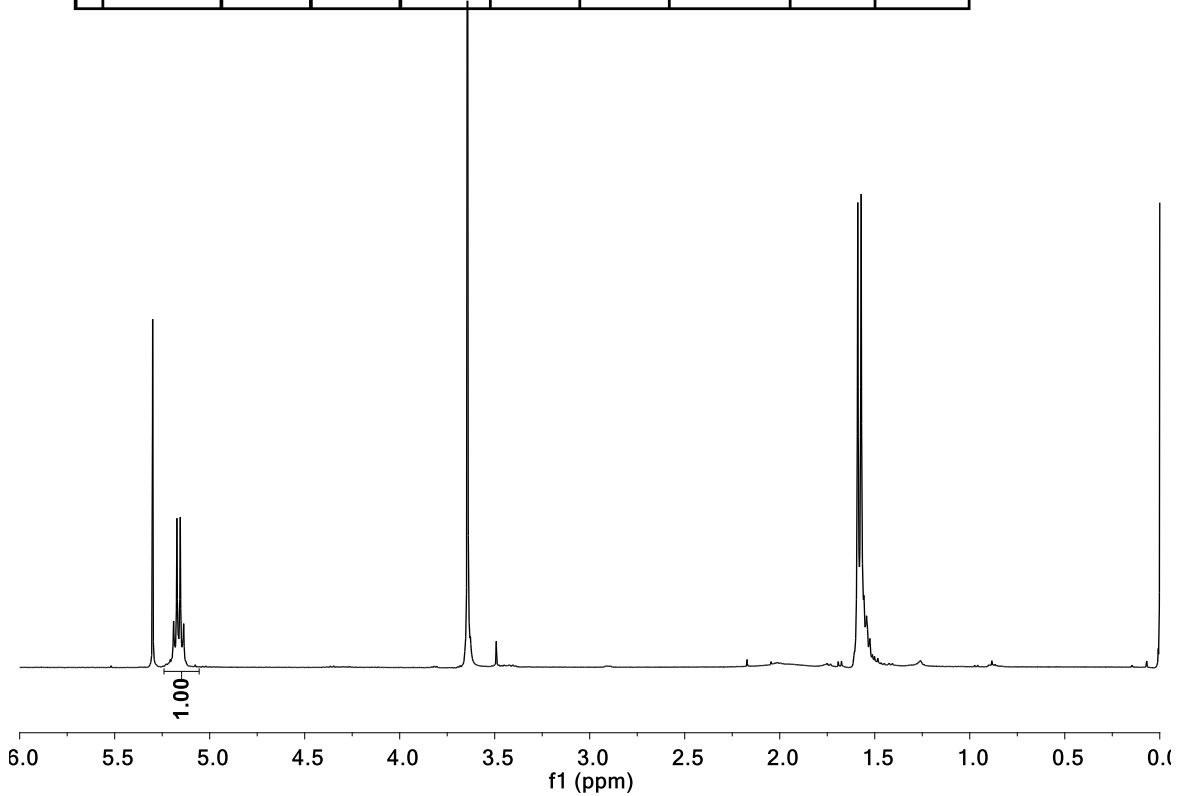

Table 1 entry 8-1

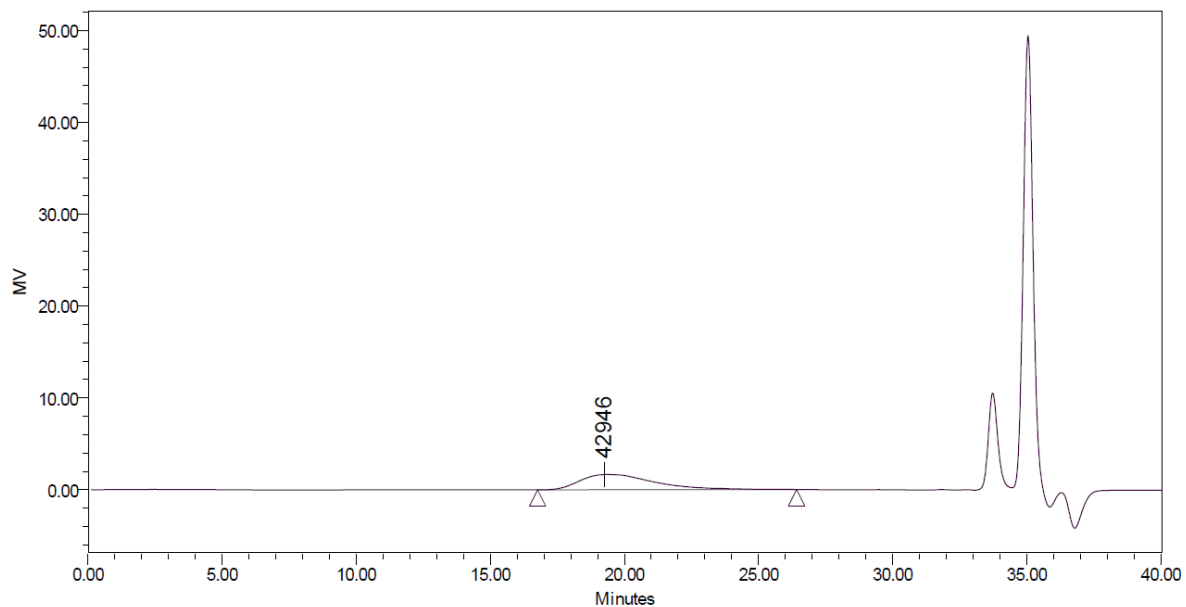

**Broad Unknown Relative Peak Table**

|   | Distribution Name | Mn (Daltons) | Mw (Daltons) | MP (Daltons) | Mz (Daltons) | Mz+1 (Daltons) | Polydispersity | Mz/Mw    | Mz+1/Mw  |
|---|-------------------|--------------|--------------|--------------|--------------|----------------|----------------|----------|----------|
| 1 |                   | 25420        | 37413        | 42946        | 48749        | 60354          | 1.471764       | 1.303013 | 1.613196 |

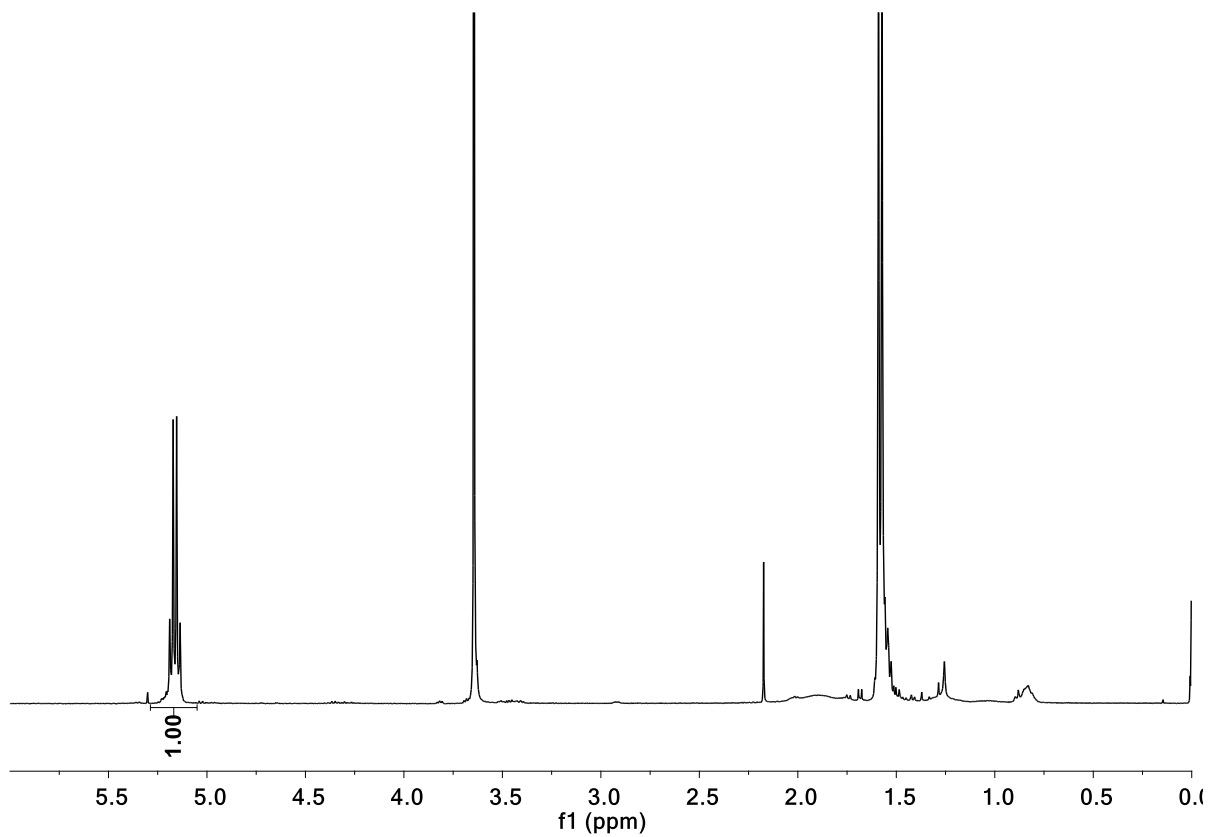

Table 1 entry 8-2

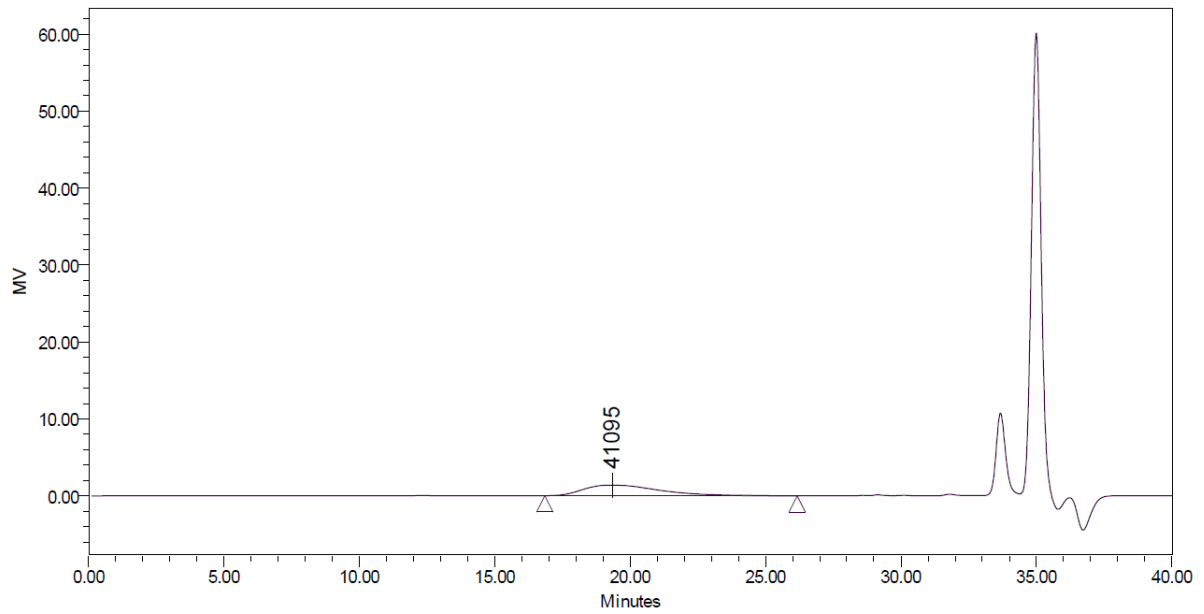

Broad Unknown Relative Peak Table

| Distribution Name | Mn (Daltons) | Mw (Daltons) | MP (Daltons) | Mz (Daltons) | Mz+1 (Daltons) | Polydispersity | Mz/Mw    | Mz+1/Mw  |
|-------------------|--------------|--------------|--------------|--------------|----------------|----------------|----------|----------|
| 1                 | 25990        | 38211        | 41095        | 50003        | 61945          | 1.470261       | 1.308589 | 1.621111 |

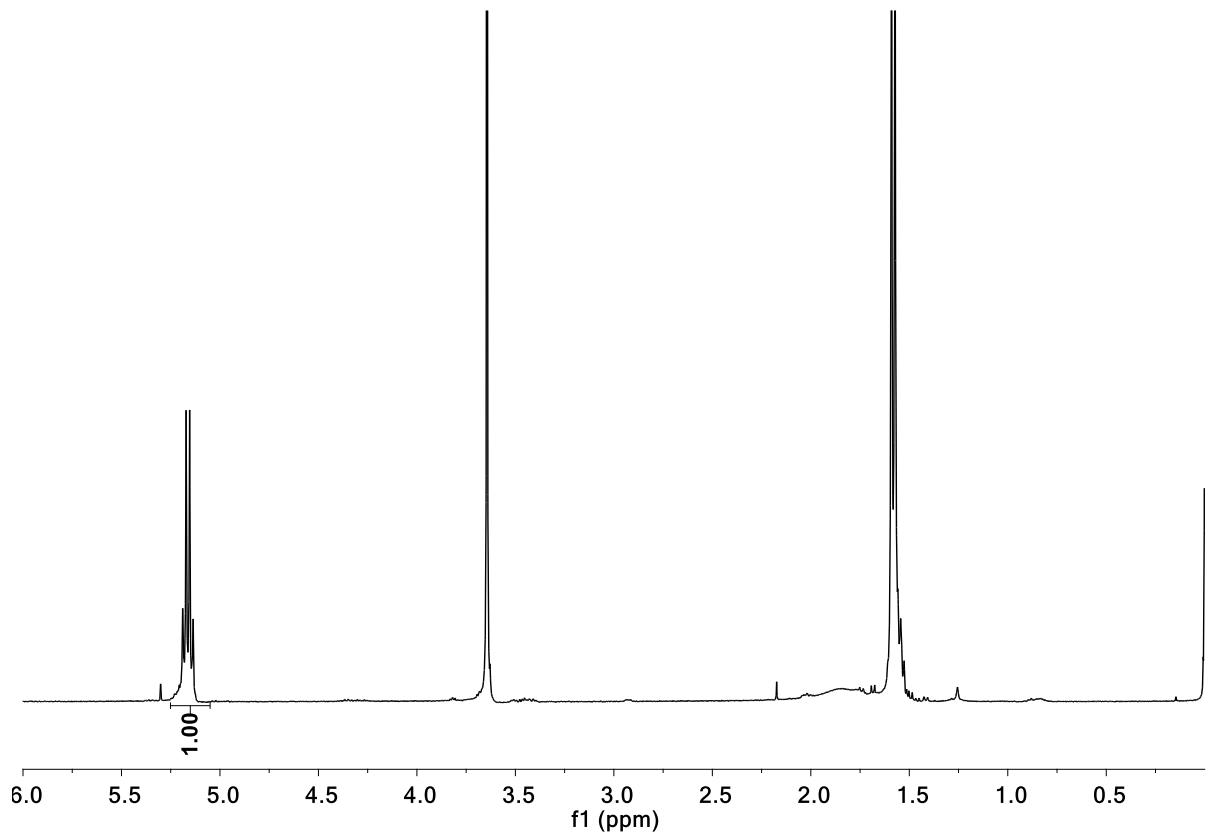



Table 1 entry 9-1

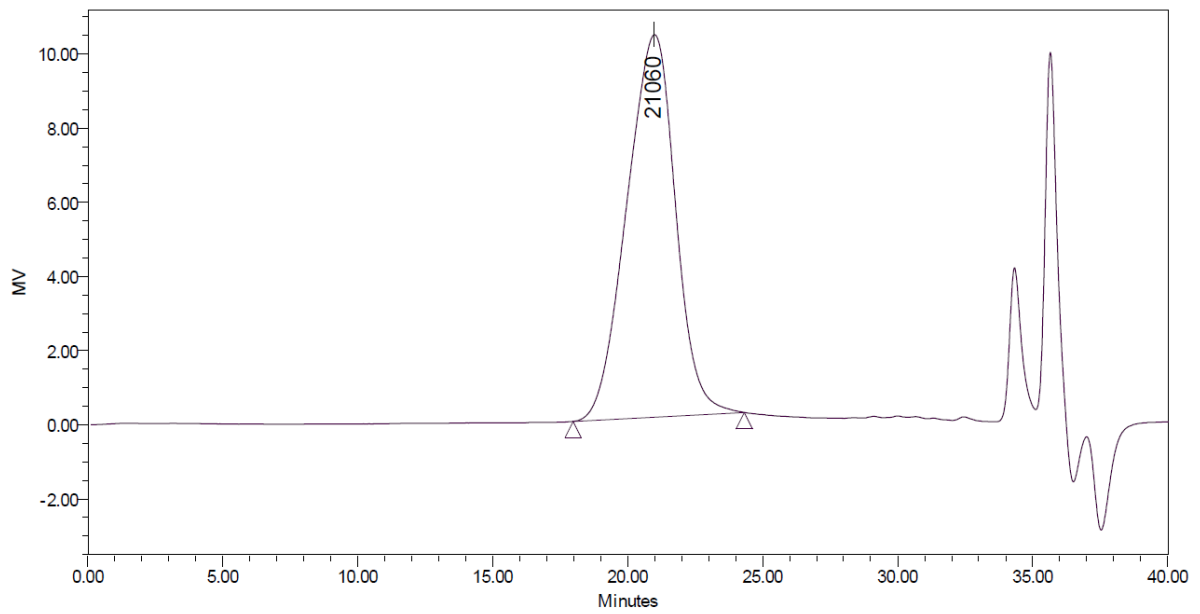

Broad Unknown Relative Peak Table

| Distribution Name | Mn (Daltons) | Mw (Daltons) | MP (Daltons) | Mz (Daltons) | Mz+1 (Daltons) | Polydispersity | Mz/Mw    | Mz+1/Mw  |
|-------------------|--------------|--------------|--------------|--------------|----------------|----------------|----------|----------|
| 1                 | 20856        | 23589        | 21060        | 26605        | 29961          | 1.131045       | 1.127846 | 1.270107 |

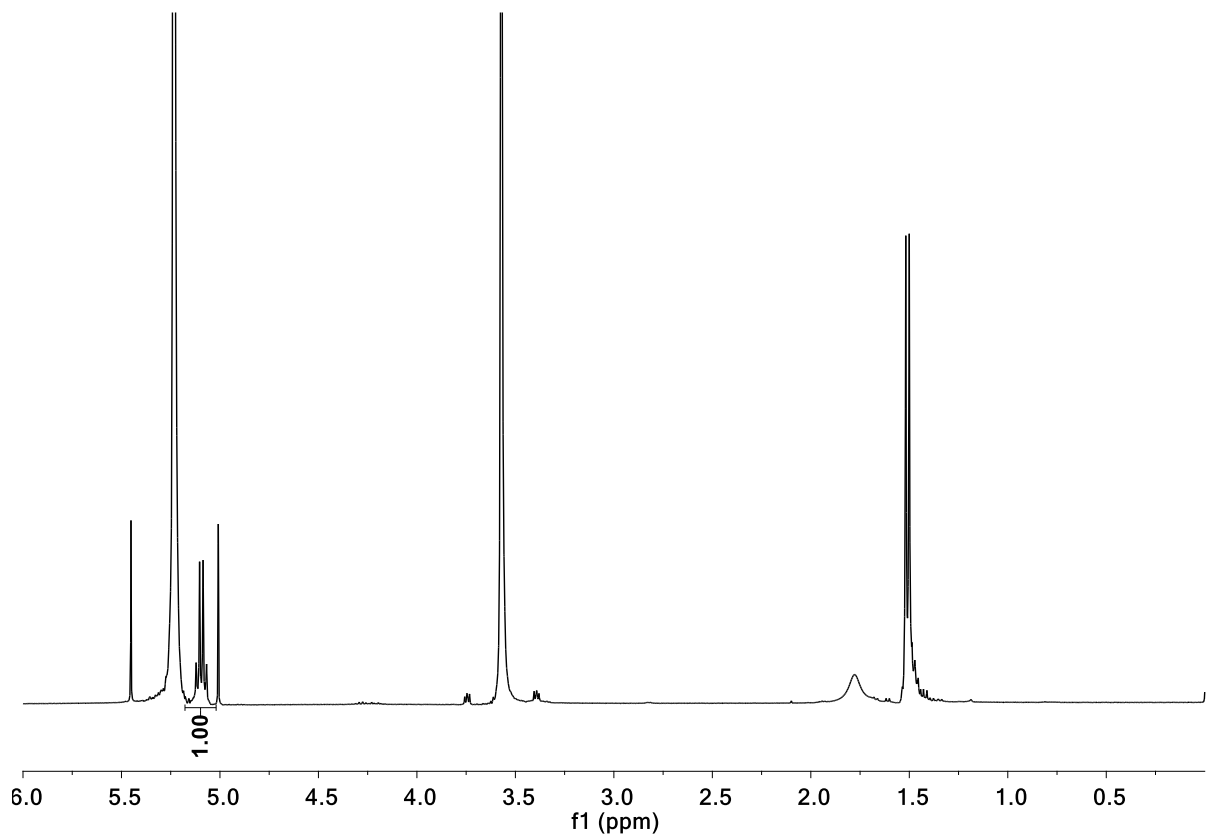

Table 1 entry 9-2

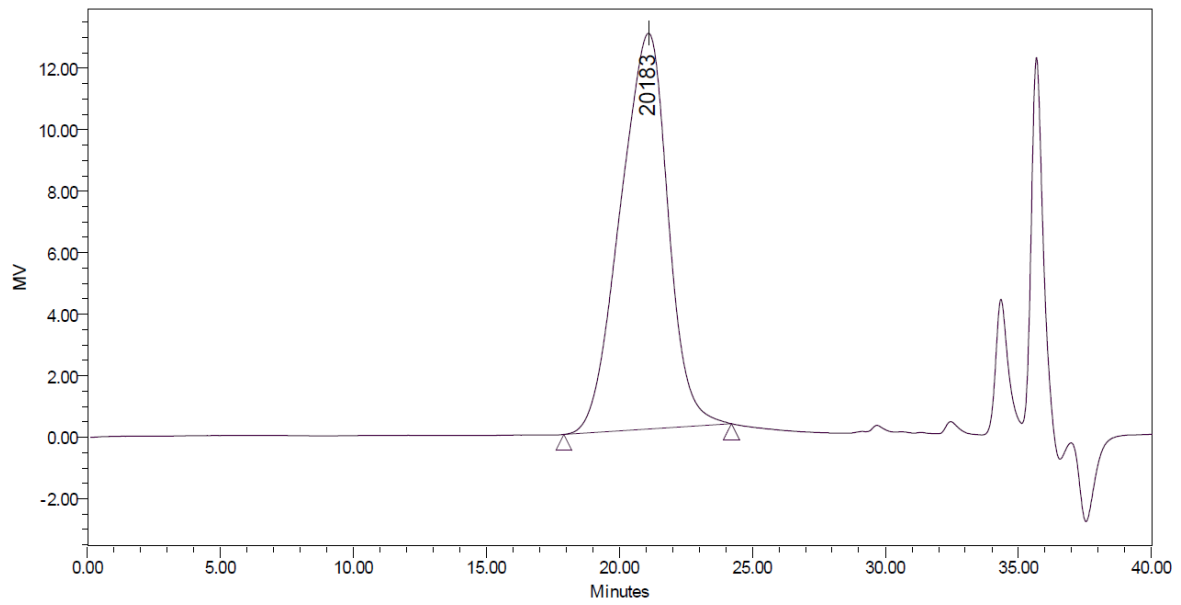

Broad Unknown Relative Peak Table

| Distribution Name | Mn (Daltons) | Mw (Daltons) | MP (Daltons) | Mz (Daltons) | Mz+1 (Daltons) | Polydispersity | Mz/Mw    | Mz+1/Mw  |
|-------------------|--------------|--------------|--------------|--------------|----------------|----------------|----------|----------|
| 1                 | 20447        | 23118        | 20183        | 26106        | 29468          | 1.130610       | 1.129288 | 1.274716 |

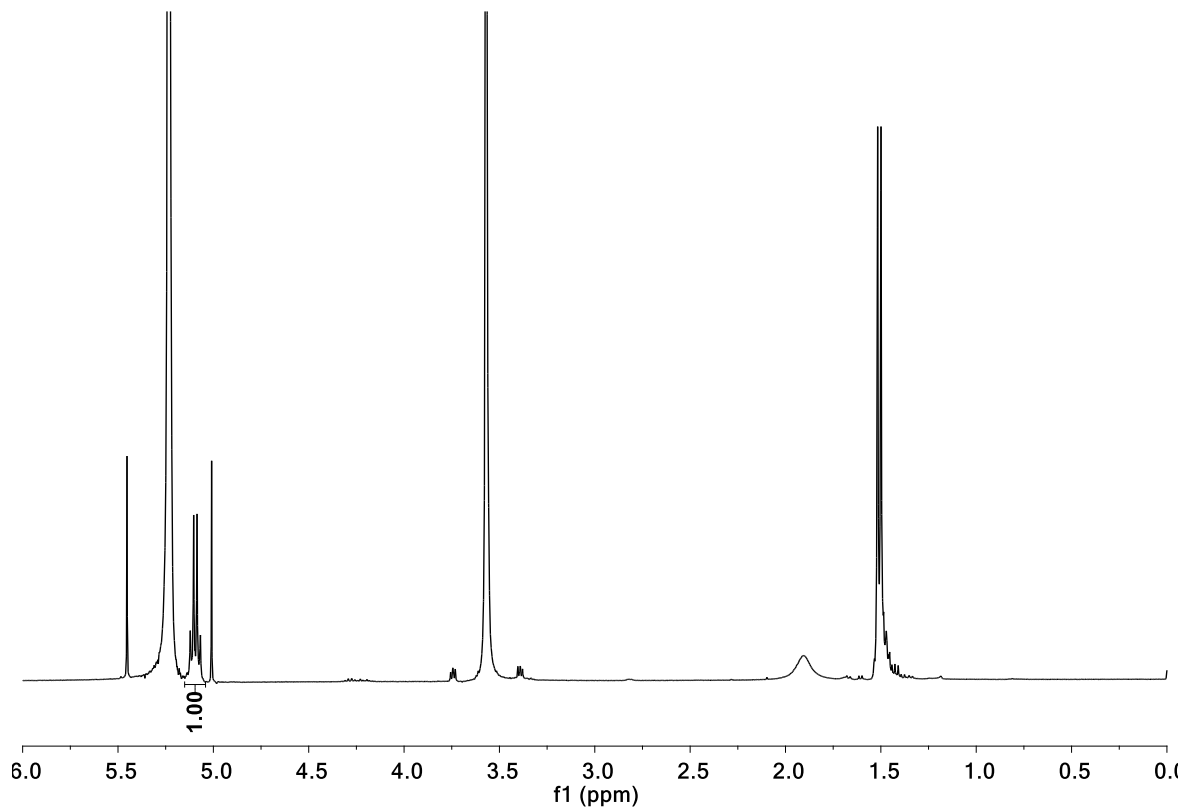

Table 1 entry 10-1

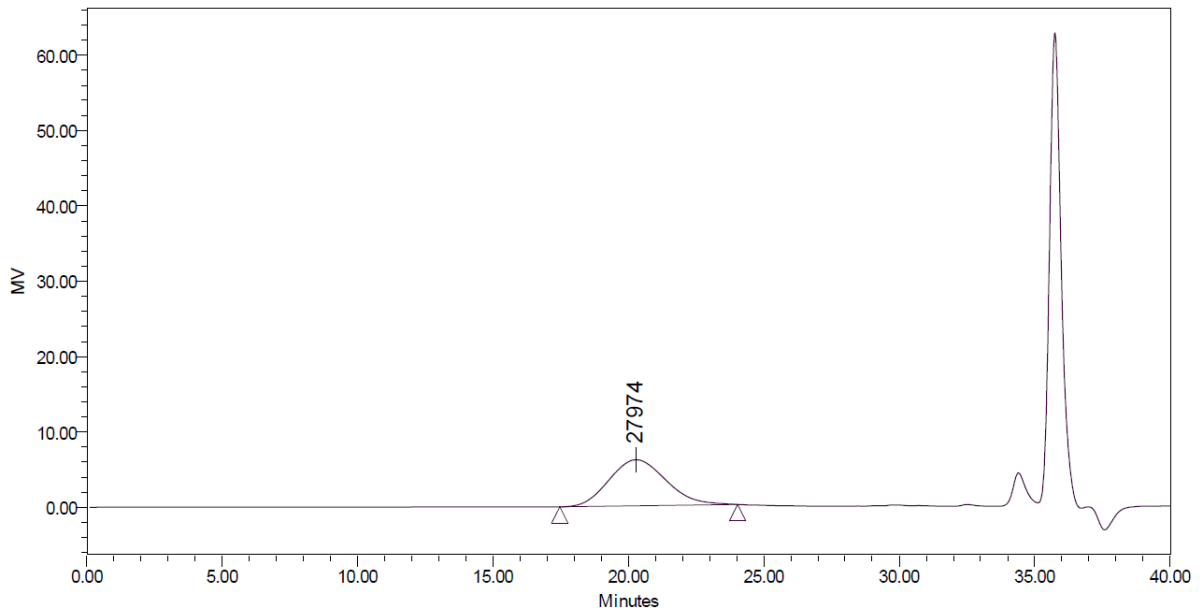

Broad Unknown Relative Peak Table

| Distribution Name | Mn (Daltons) | Mw (Daltons) | MP (Daltons) | Mz (Daltons) | Mz+1 (Daltons) | Polydispersity | Mz/Mw    | Mz+1/Mw  |
|-------------------|--------------|--------------|--------------|--------------|----------------|----------------|----------|----------|
| 1                 | 24518        | 28984        | 27974        | 33791        | 39034          | 1.182145       | 1.165848 | 1.346714 |

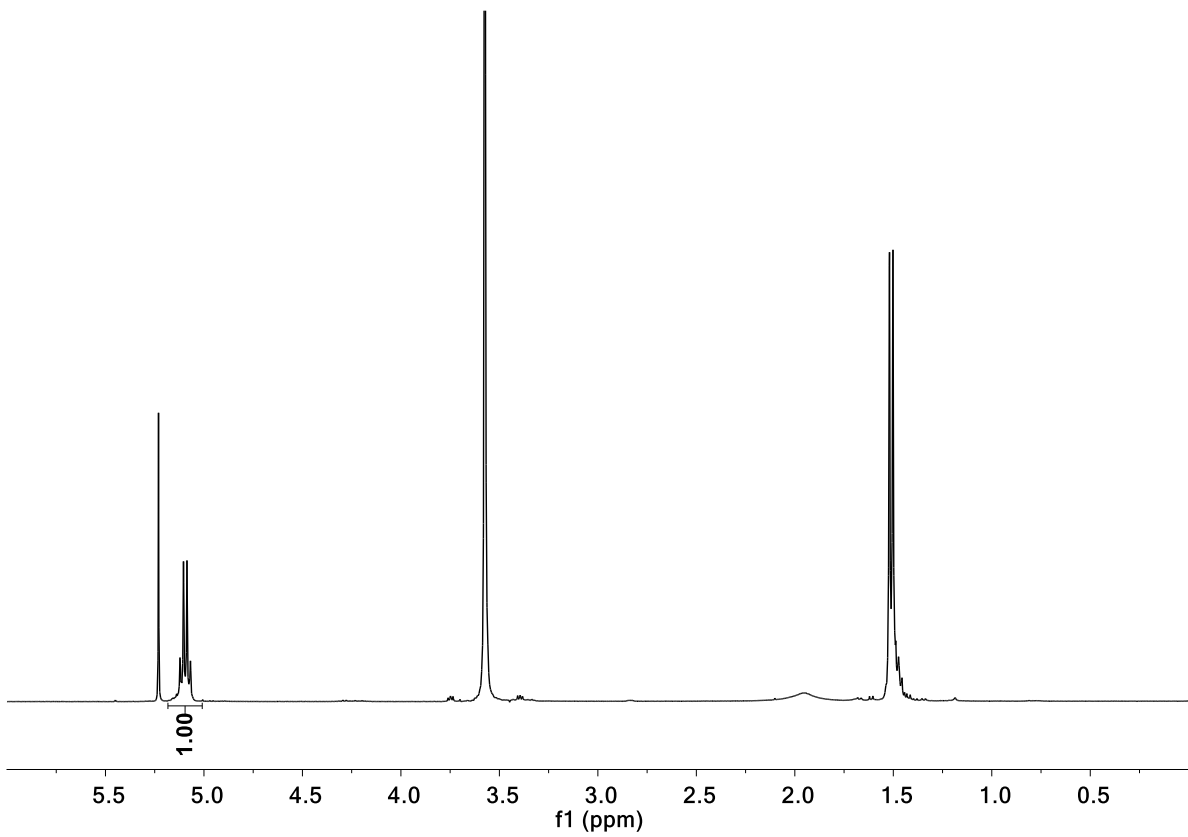

Table 1 entry 10-2

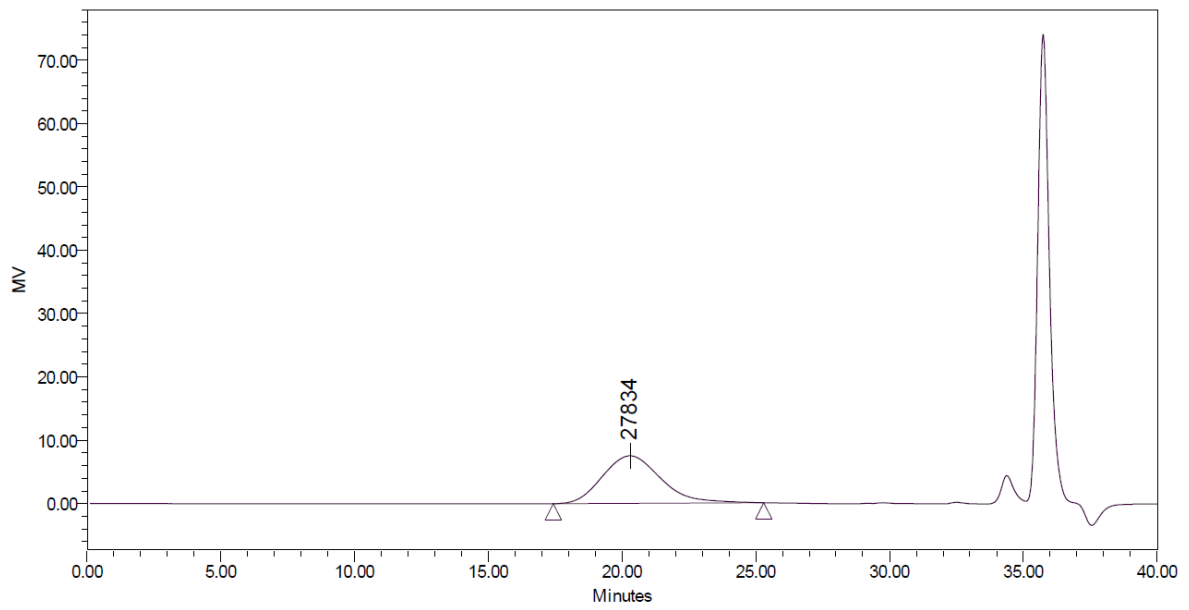

Broad Unknown Relative Peak Table

| Distribution Name | Mn (Daltons) | Mw (Daltons) | MP (Daltons) | Mz (Daltons) | Mz+1 (Daltons) | Polydispersity | Mz/Mw    | Mz+1/Mw  |
|-------------------|--------------|--------------|--------------|--------------|----------------|----------------|----------|----------|
| 1                 | 23260        | 28665        | 27834        | 33988        | 39627          | 1.232359       | 1.185695 | 1.382415 |

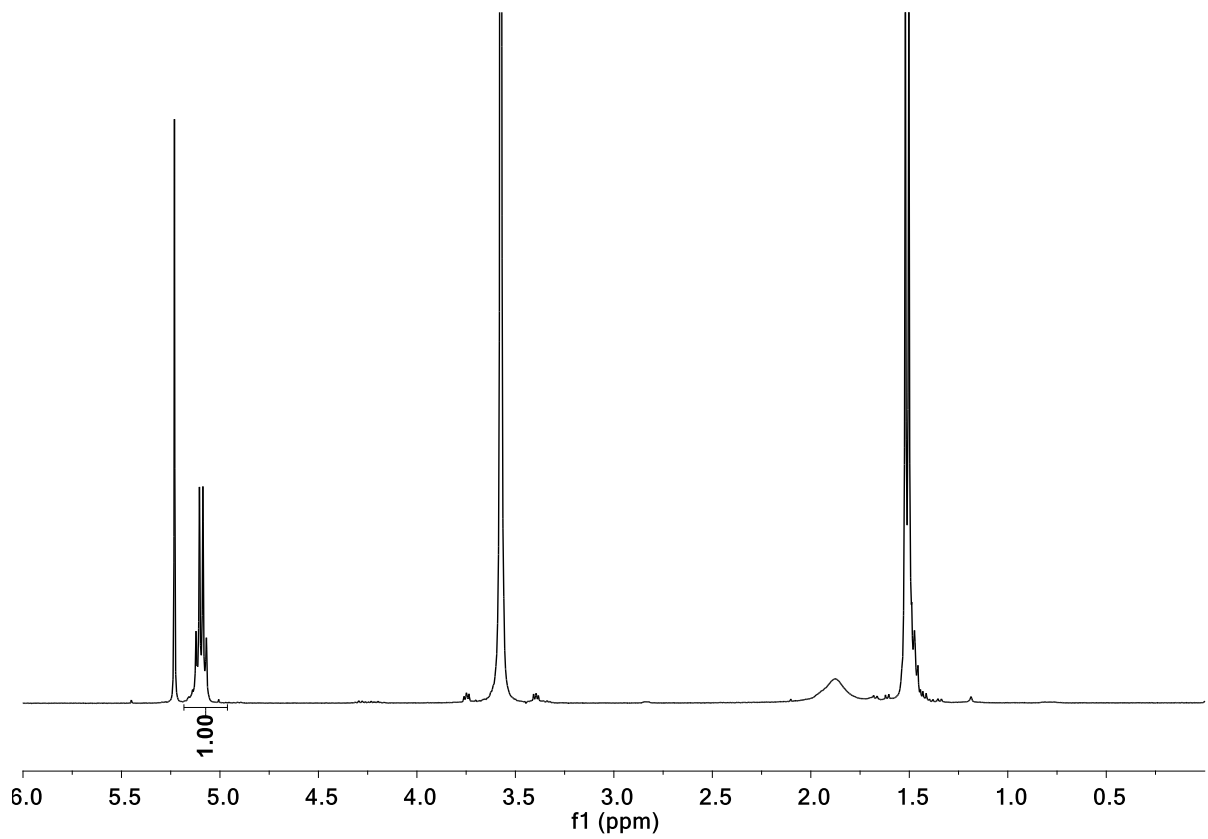

Table 1 entry 11-1

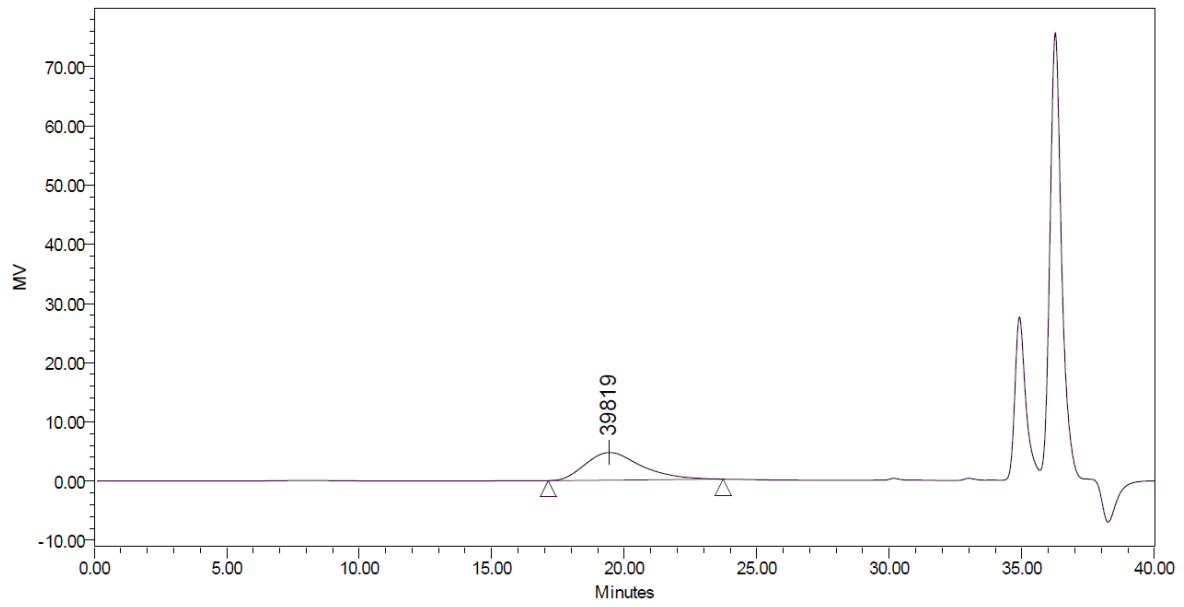

Broad Unknown Relative Peak Table

| Distribution Name | Mn (Daltons) | Mw (Daltons) | MP (Daltons) | Mz (Daltons) | Mz+1 (Daltons) | Polydispersity | Mz/Mw    | Mz+1/Mw  |
|-------------------|--------------|--------------|--------------|--------------|----------------|----------------|----------|----------|
| 1                 | 31987        | 39227        | 39819        | 46763        | 54650          | 1.226329       | 1.192116 | 1.393182 |

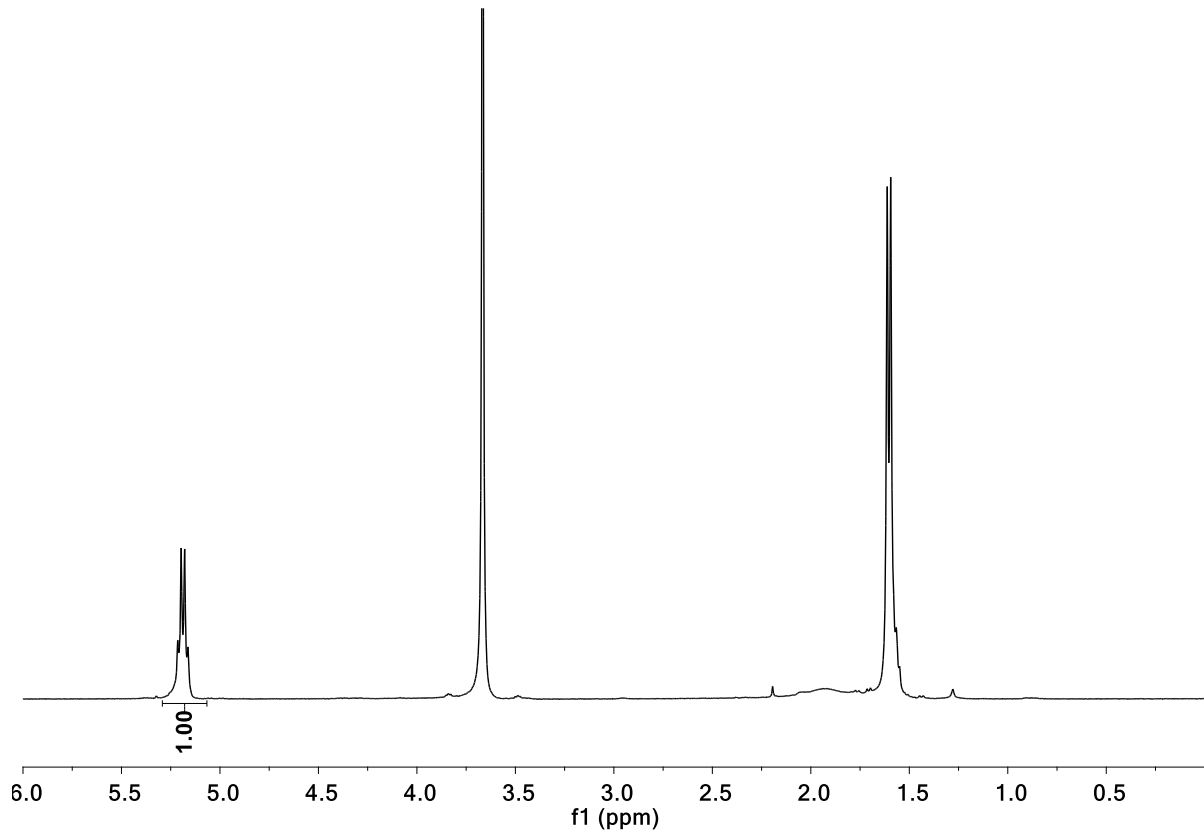

Table 1 entry 11-2

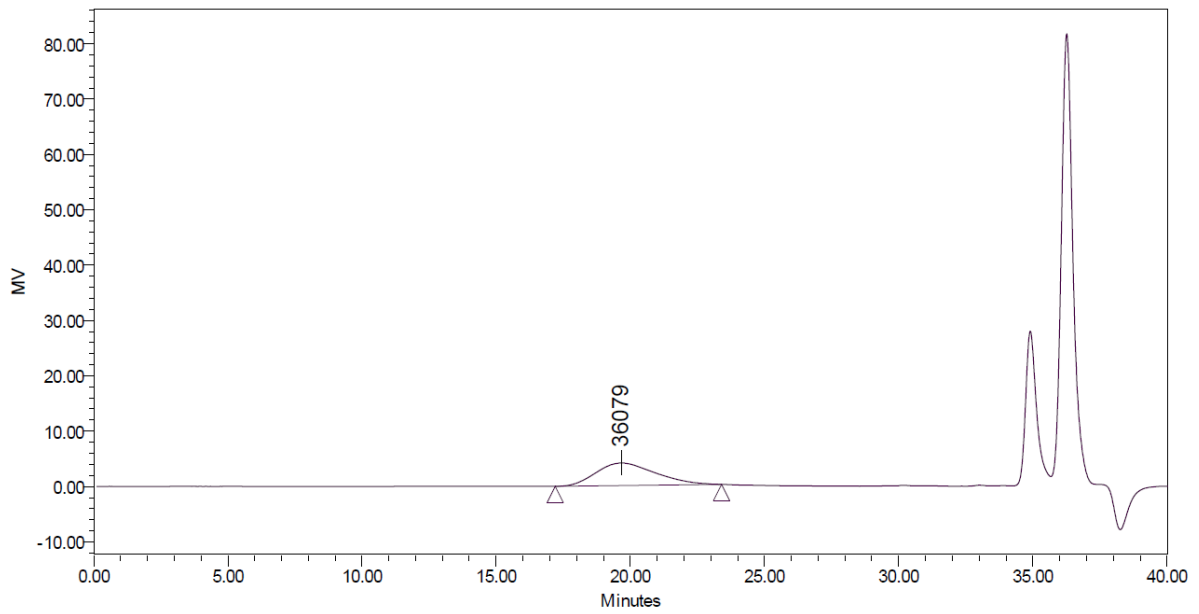

Broad Unknown Relative Peak Table

| Distribution Name | Mn (Daltons) | Mw (Daltons) | MP (Daltons) | Mz (Daltons) | Mz+1 (Daltons) | Polydispersity | Mz/Mw    | Mz+1/Mw  |
|-------------------|--------------|--------------|--------------|--------------|----------------|----------------|----------|----------|
| 1                 | 29403        | 35676        | 36079        | 42525        | 49835          | 1.213325       | 1.191968 | 1.396880 |

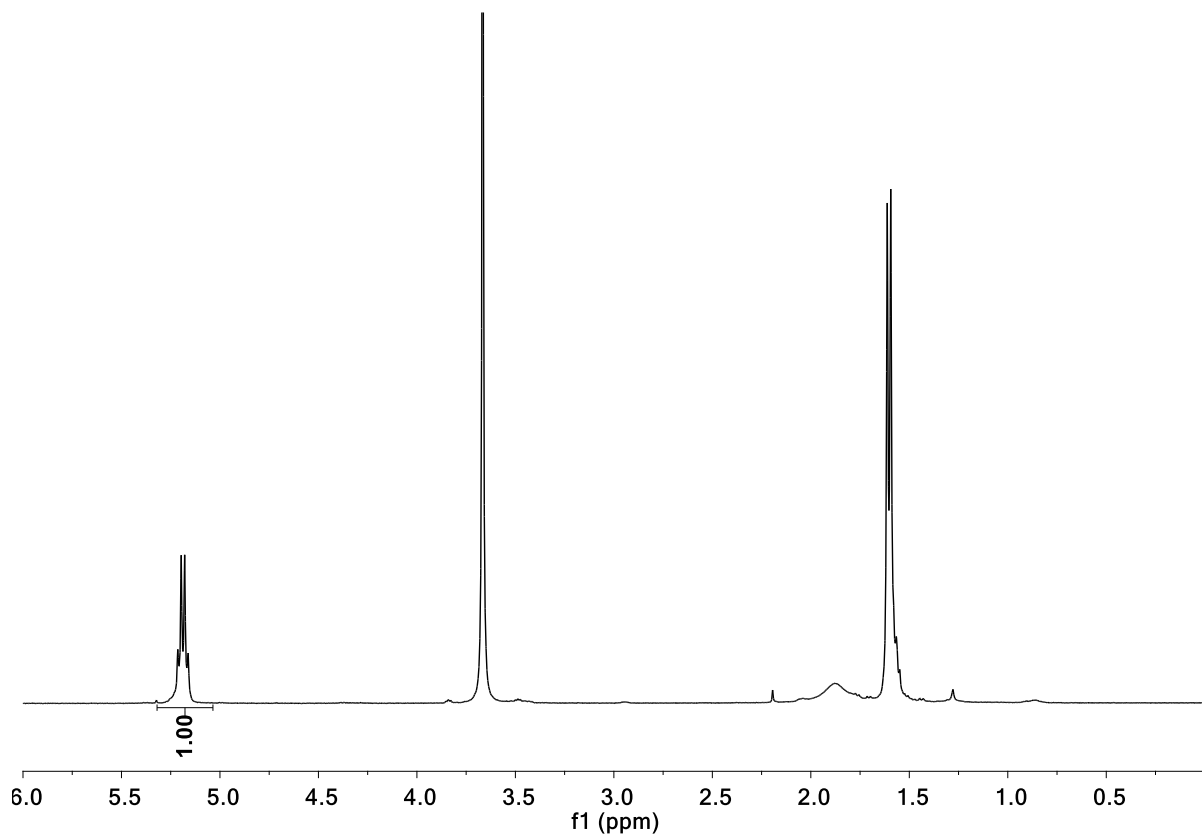

Table 2 entry 1-1

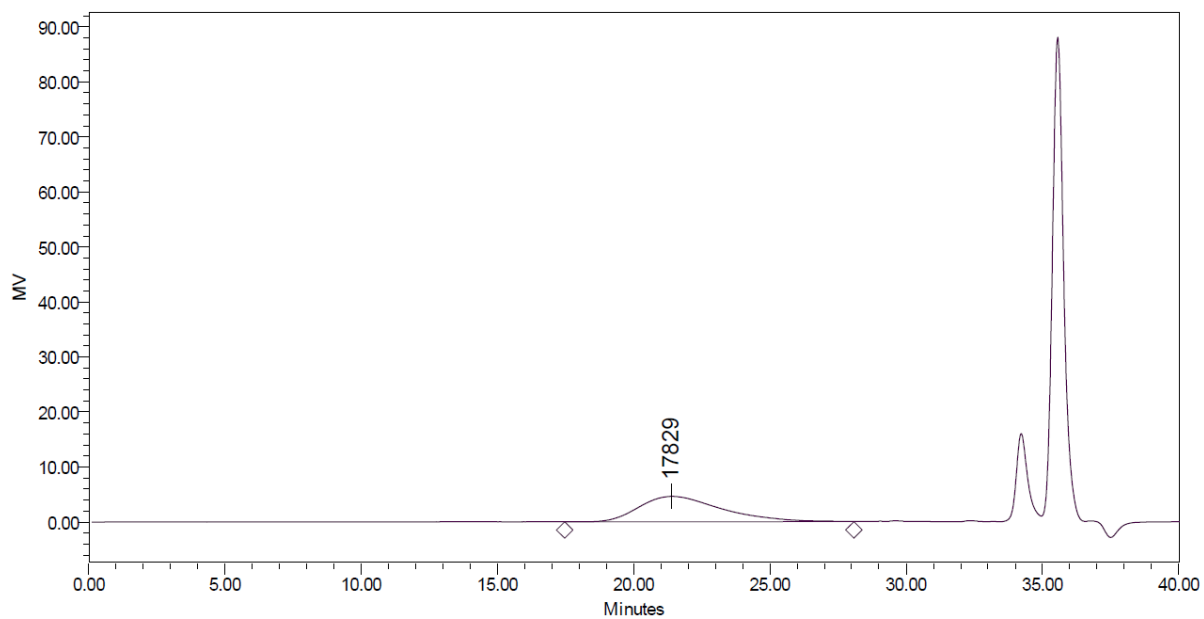

Broad Unknown Relative Peak Table

| Distribution Name | Mn (Daltons) | Mw (Daltons) | MP (Daltons) | Mz (Daltons) | Mz+1 (Daltons) | Polydispersity | Mz/Mw    | Mz+1/Mw  |
|-------------------|--------------|--------------|--------------|--------------|----------------|----------------|----------|----------|
| 1                 | 10765        | 16524        | 17829        | 21871        | 27118          | 1.534957       | 1.323552 | 1.641068 |

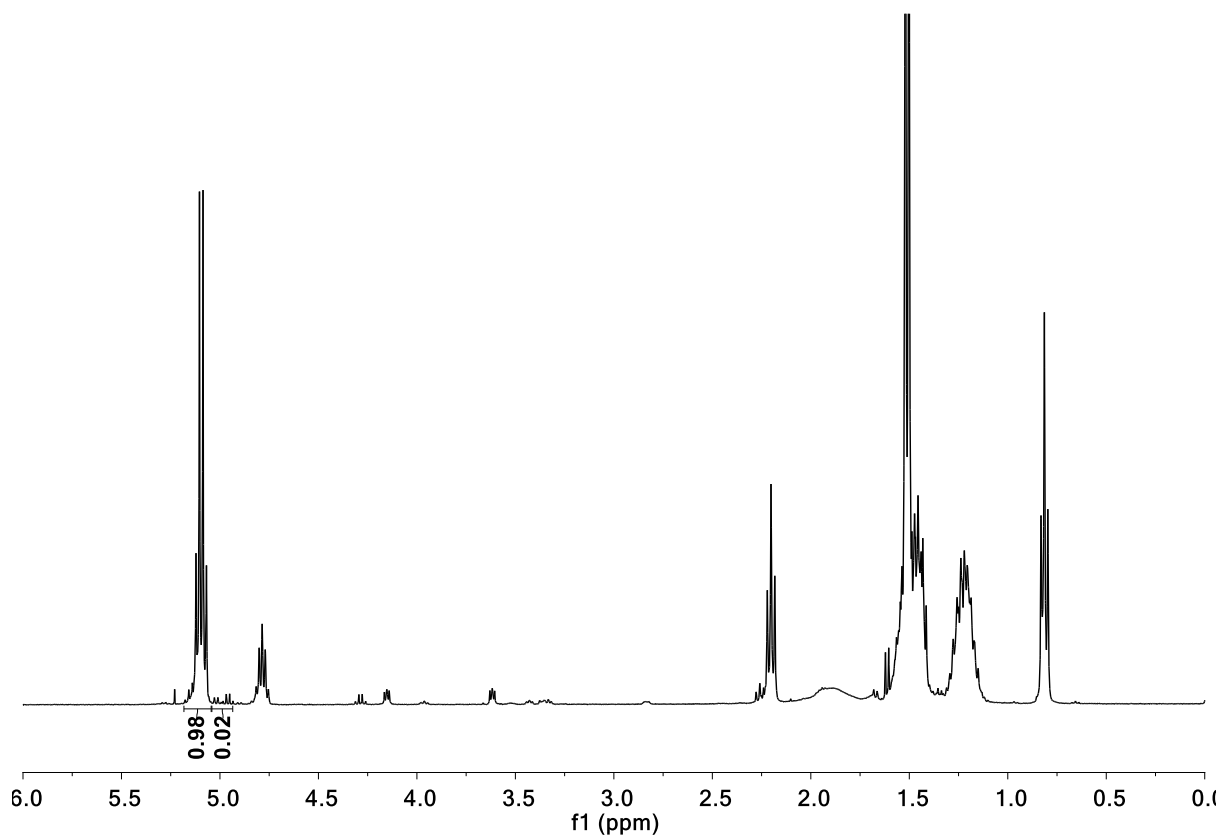

Table 2 entry 1-2

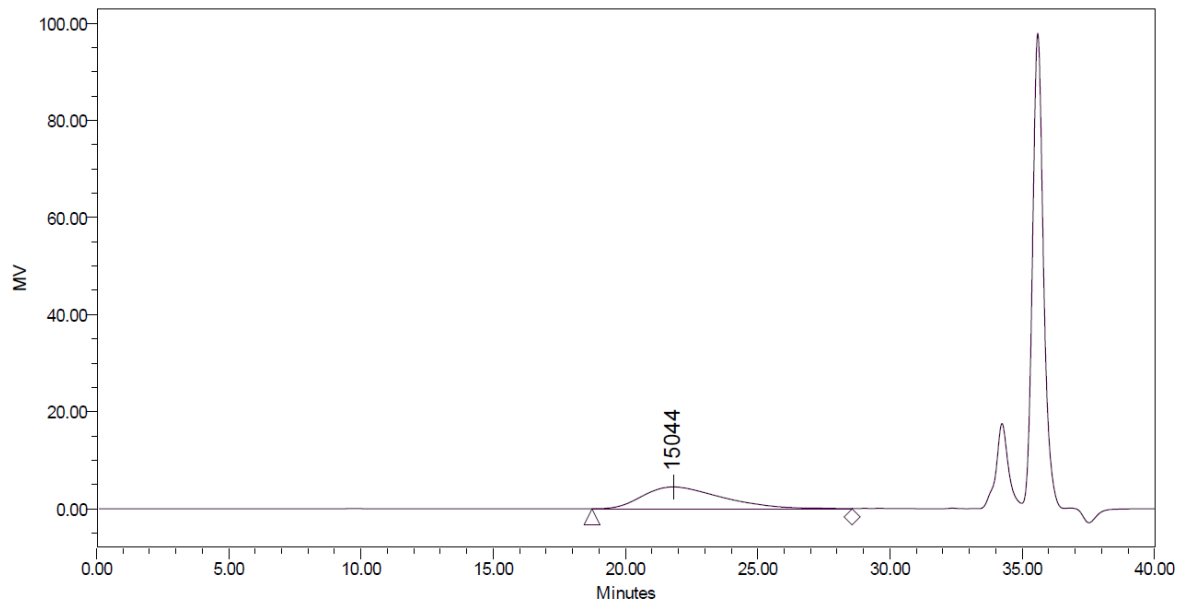

Broad Unknown Relative Peak Table

| Distribution Name | Mn (Daltons) | Mw (Daltons) | MP (Daltons) | Mz (Daltons) | Mz+1 (Daltons) | Polydispersity | Mz/Mw    | Mz+1/Mw  |
|-------------------|--------------|--------------|--------------|--------------|----------------|----------------|----------|----------|
| 1                 | 9040         | 13629        | 15044        | 17716        | 21212          | 1.507573       | 1.299868 | 1.556392 |

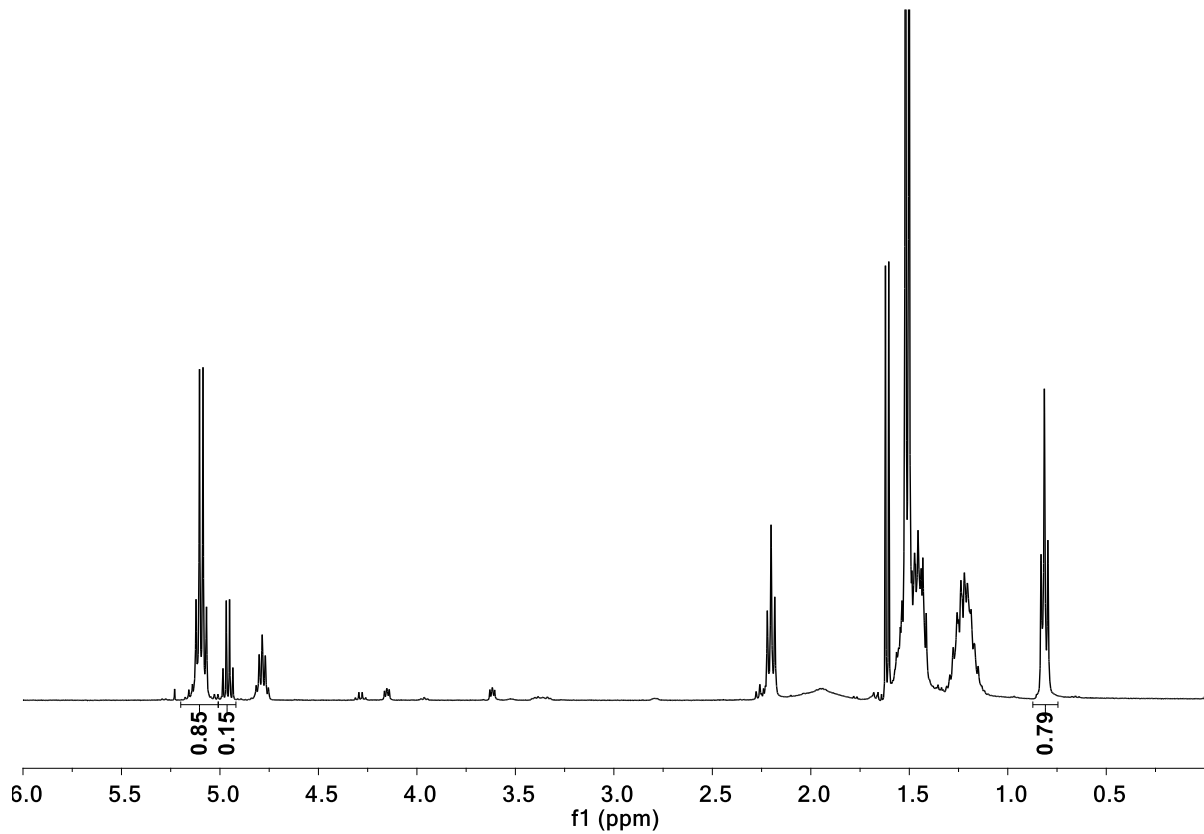



Table 2 entry 2-1

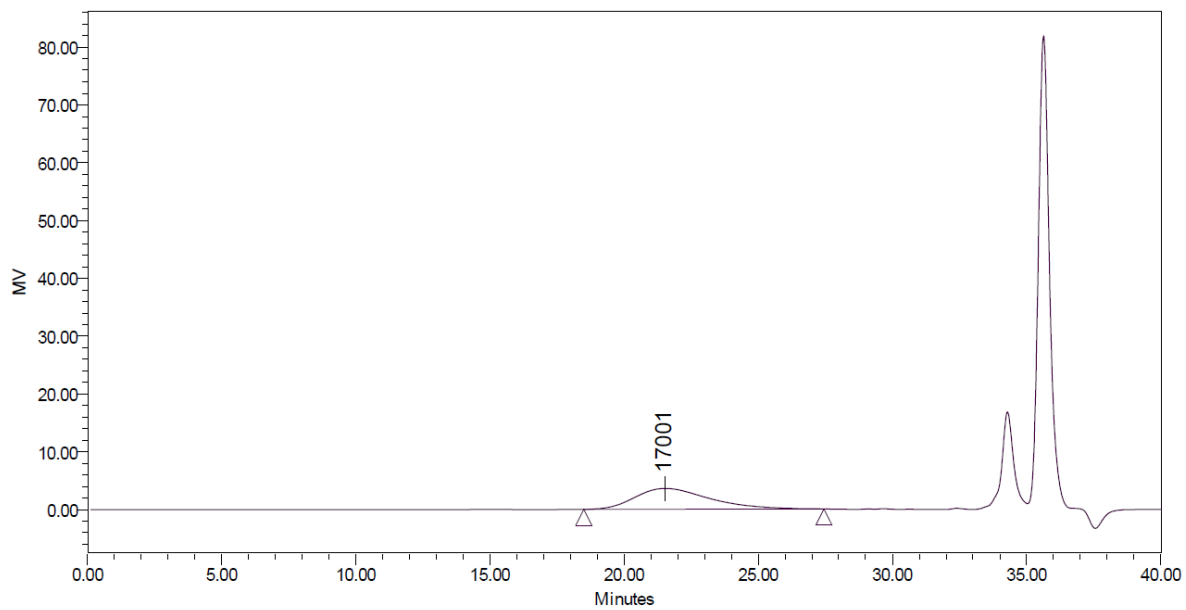

Broad Unknown Relative Peak Table

| Distribution Name | Mn (Daltons) | Mw (Daltons) | MP (Daltons) | Mz (Daltons) | Mz+1 (Daltons) | Polydispersity | Mz/Mw    | Mz+1/Mw  |
|-------------------|--------------|--------------|--------------|--------------|----------------|----------------|----------|----------|
| 1                 | 11277        | 15848        | 17001        | 20066        | 23897          | 1.405396       | 1.266130 | 1.507844 |

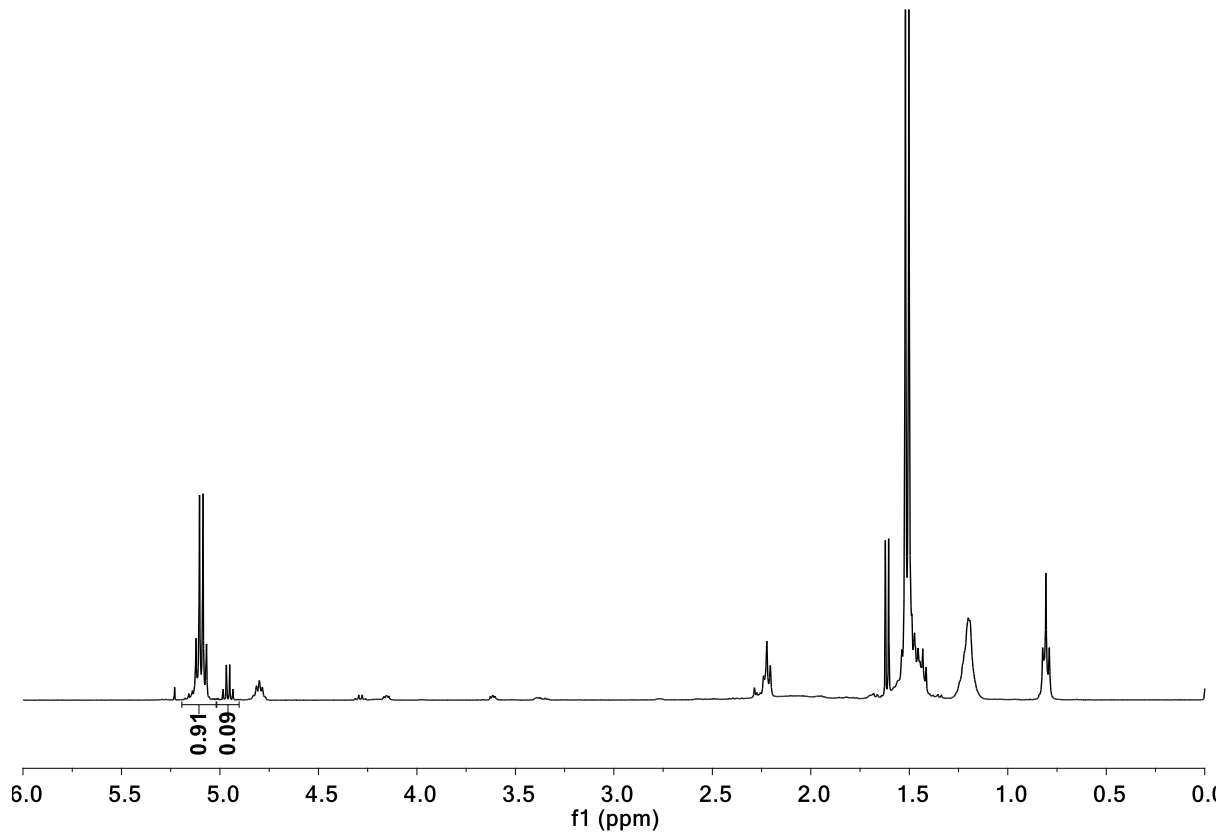

Table 2 entry 2-2

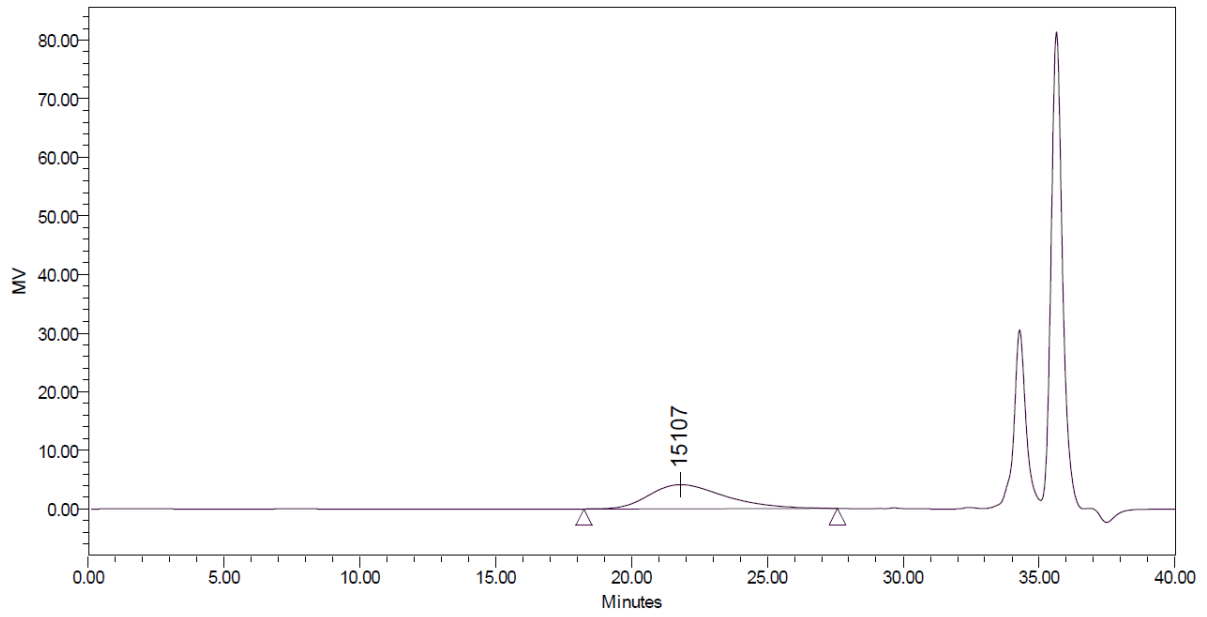

Broad Unknown Relative Peak Table

| Distribution Name | Mn (Daltons) | Mw (Daltons) | MP (Daltons) | Mz (Daltons) | Mz+1 (Daltons) | Polydispersity | Mz/Mw    | Mz+1/Mw  |
|-------------------|--------------|--------------|--------------|--------------|----------------|----------------|----------|----------|
| 1                 | 10137        | 14308        | 15107        | 18297        | 22074          | 1.411515       | 1.278794 | 1.542752 |

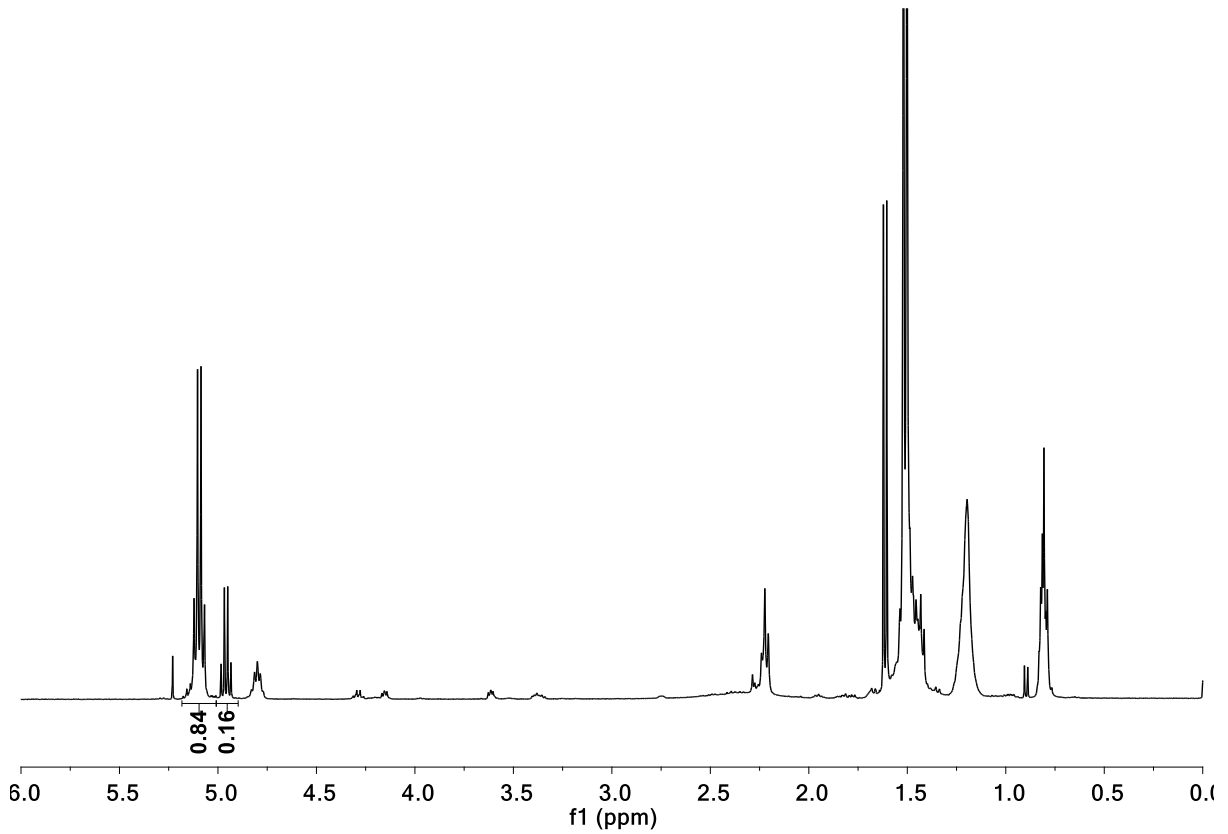

Table 2 entry 3-1

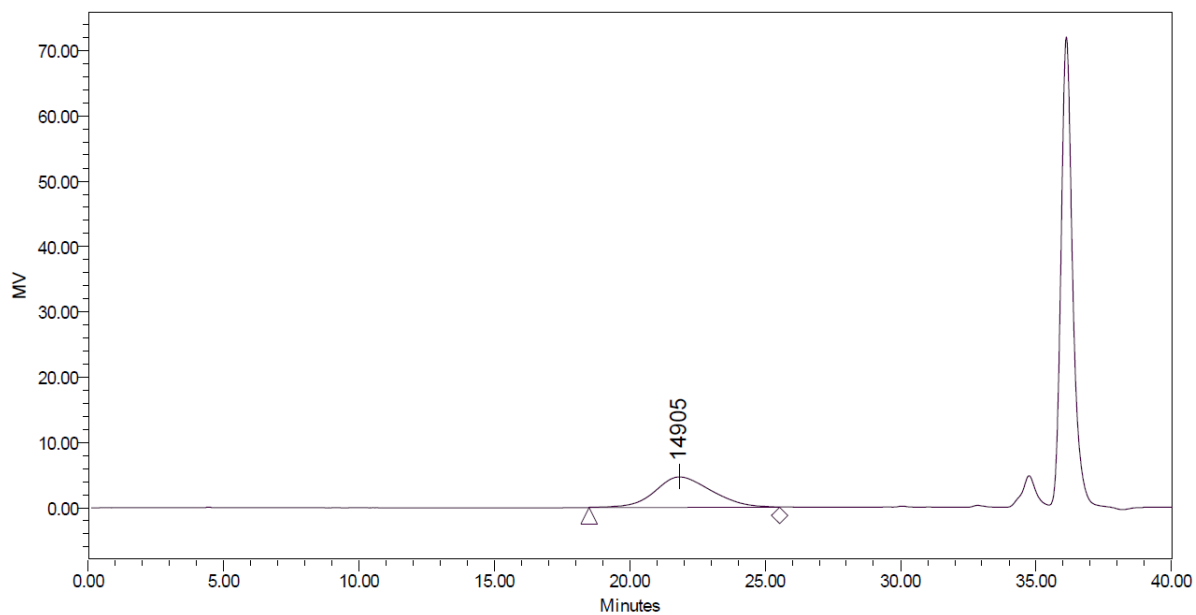

Broad Unknown Relative Peak Table

| Distribution Name | Mn (Daltons) | Mw (Daltons) | MP (Daltons) | Mz (Daltons) | Mz+1 (Daltons) | Polydispersity | Mz/Mw    | Mz+1/Mw  |
|-------------------|--------------|--------------|--------------|--------------|----------------|----------------|----------|----------|
| 1                 | 12138        | 14701        | 14905        | 17493        | 20698          | 1.211146       | 1.189924 | 1.407957 |

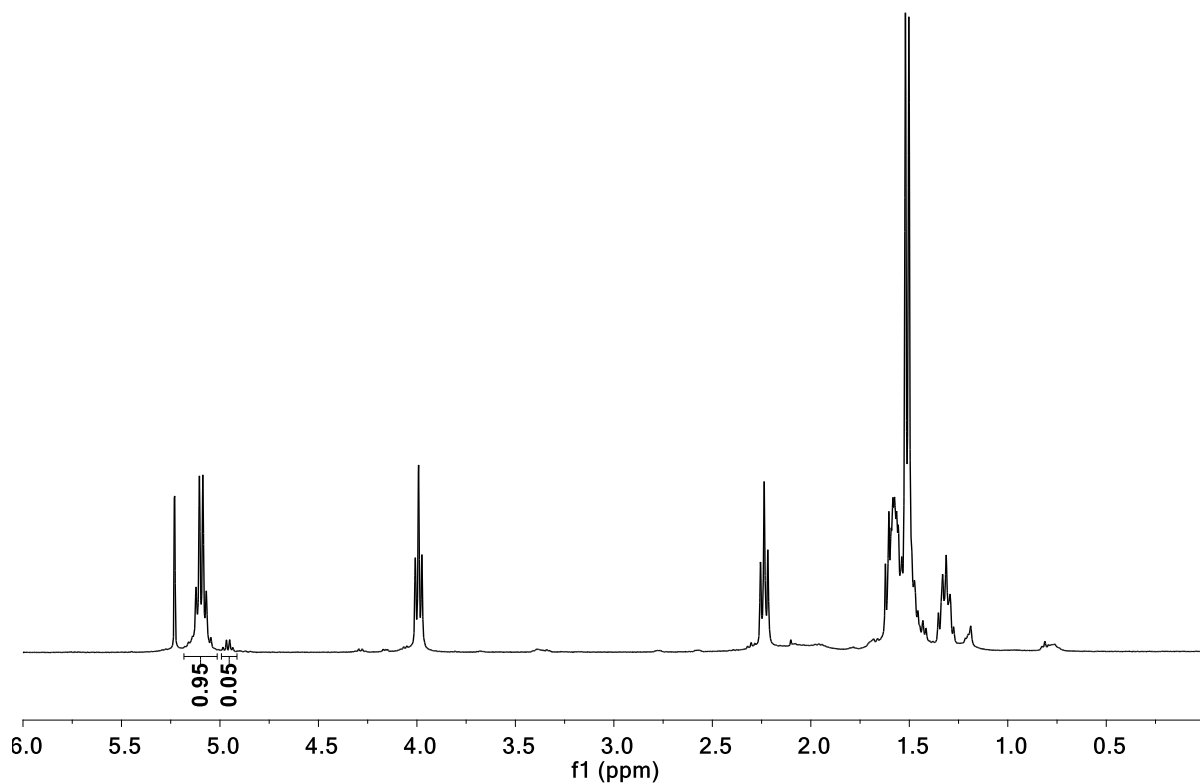

Table 2 entry 3-2

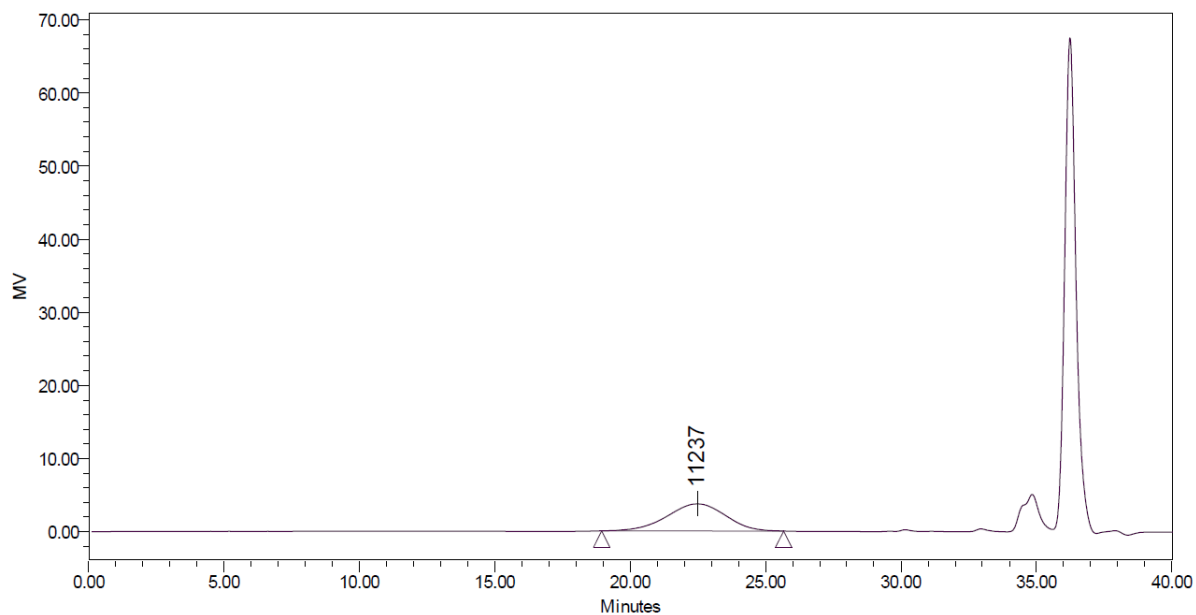

Broad Unknown Relative Peak Table

| Distribution Name | Mn (Daltons) | Mw (Daltons) | MP (Daltons) | Mz (Daltons) | Mz+1 (Daltons) | Polydispersity | Mz/Mw    | Mz+1/Mw  |
|-------------------|--------------|--------------|--------------|--------------|----------------|----------------|----------|----------|
| 1                 | 10528        | 12637        | 11237        | 15175        | 18133          | 1.200379       | 1.200813 | 1.434921 |

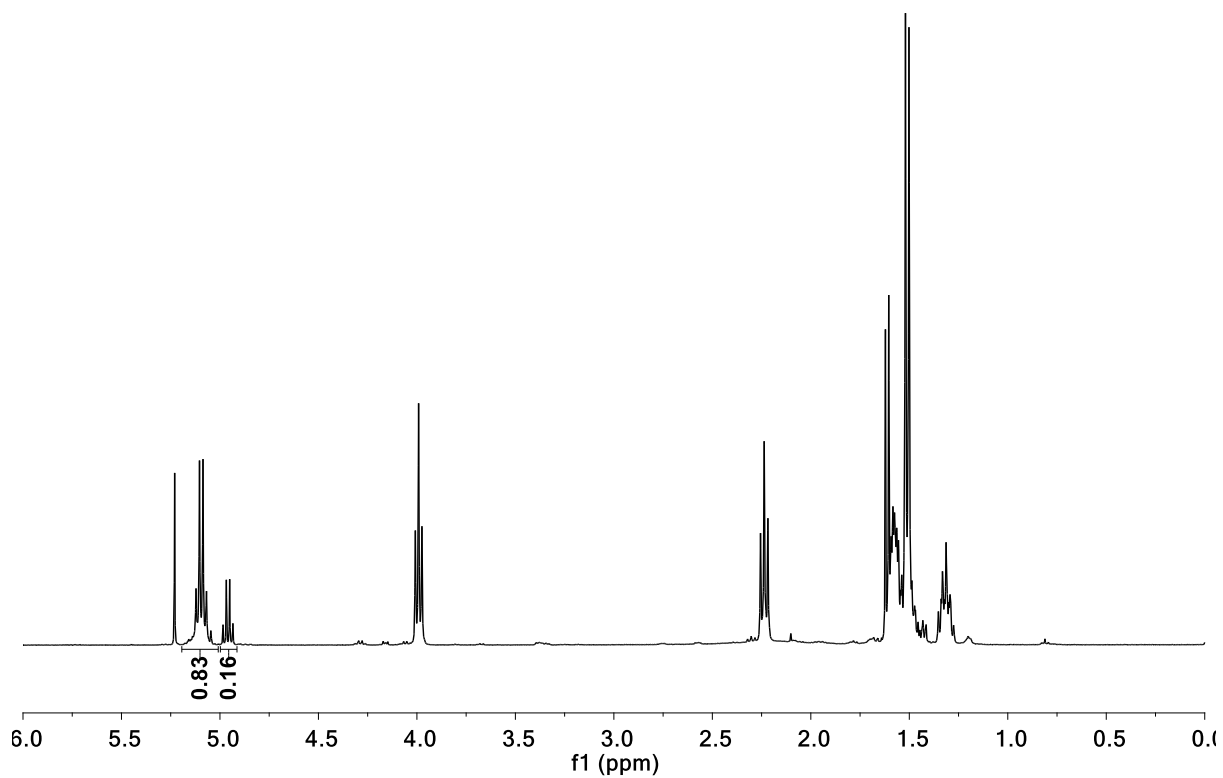

Table 2 entry 4-1

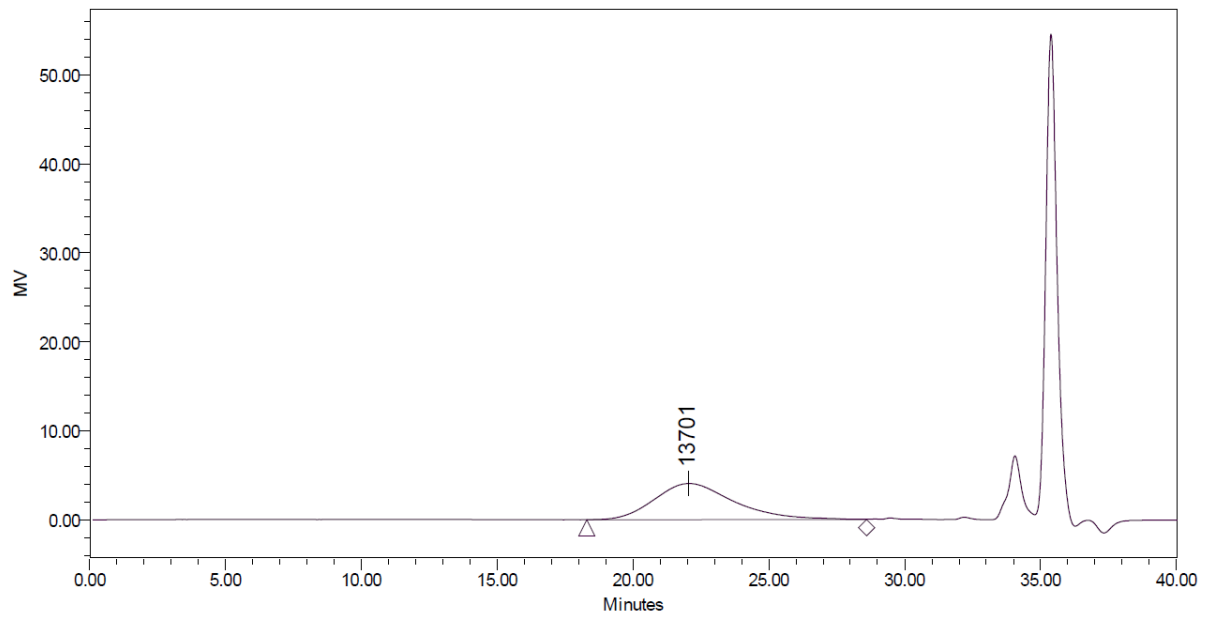

Broad Unknown Relative Peak Table

| Distribution Name | Mn (Daltons) | Mw (Daltons) | MP (Daltons) | Mz (Daltons) | Mz+1 (Daltons) | Polydispersity | Mz/Mw    | Mz+1/Mw  |
|-------------------|--------------|--------------|--------------|--------------|----------------|----------------|----------|----------|
| 1                 | 8806         | 13446        | 13701        | 17880        | 22183          | 1.526905       | 1.329754 | 1.649801 |

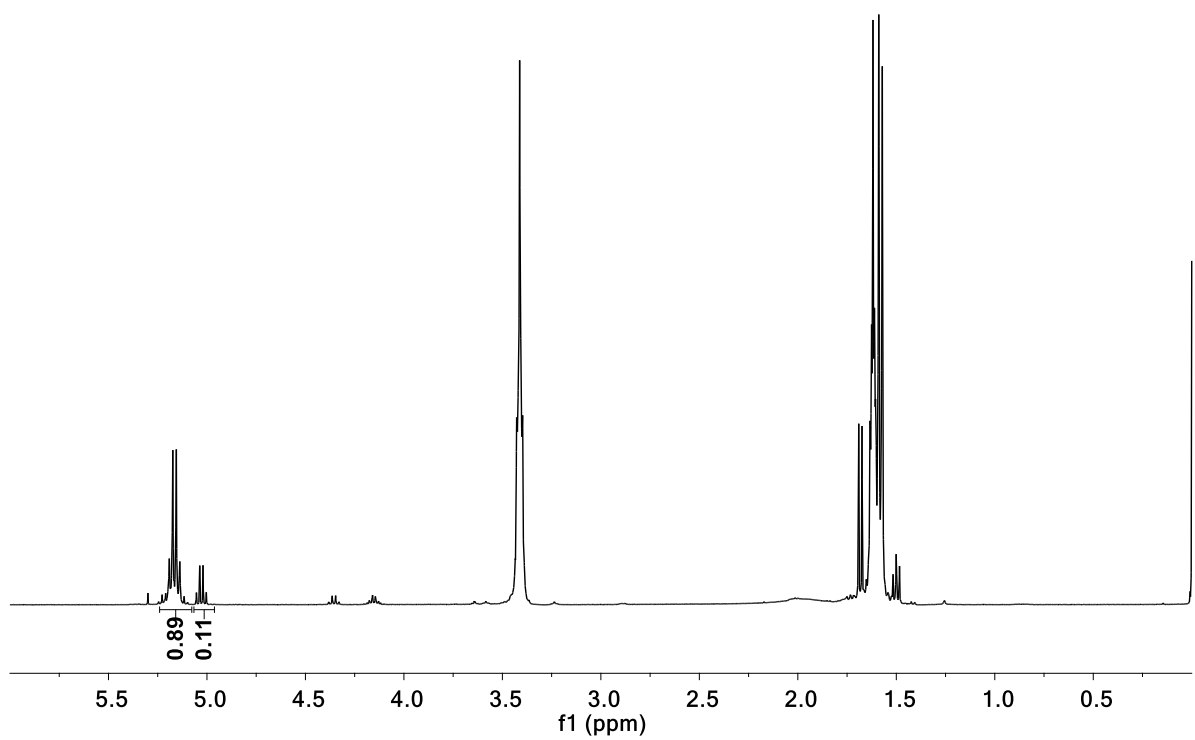

Table 2 entry 4-2

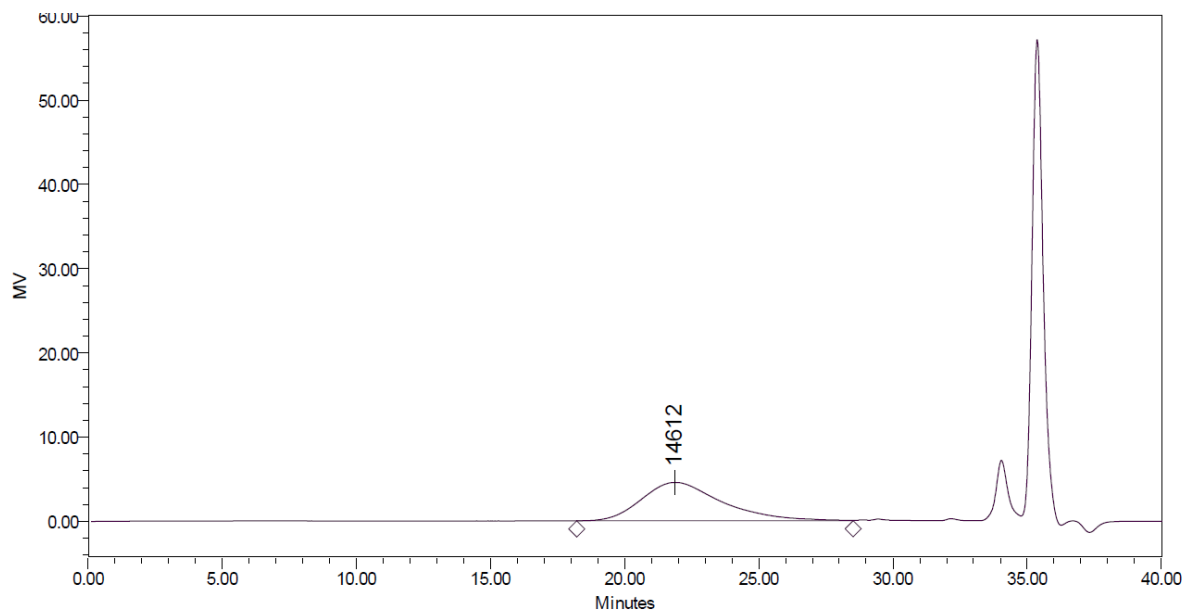

Broad Unknown Relative Peak Table

| Distribution Name | Mn (Daltons) | Mw (Daltons) | MP (Daltons) | Mz (Daltons) | Mz+1 (Daltons) | Polydispersity | Mz/Mw    | Mz+1/Mw  |
|-------------------|--------------|--------------|--------------|--------------|----------------|----------------|----------|----------|
| 1                 | 8972         | 14061        | 14612        | 18835        | 23390          | 1.567154       | 1.339554 | 1.663468 |

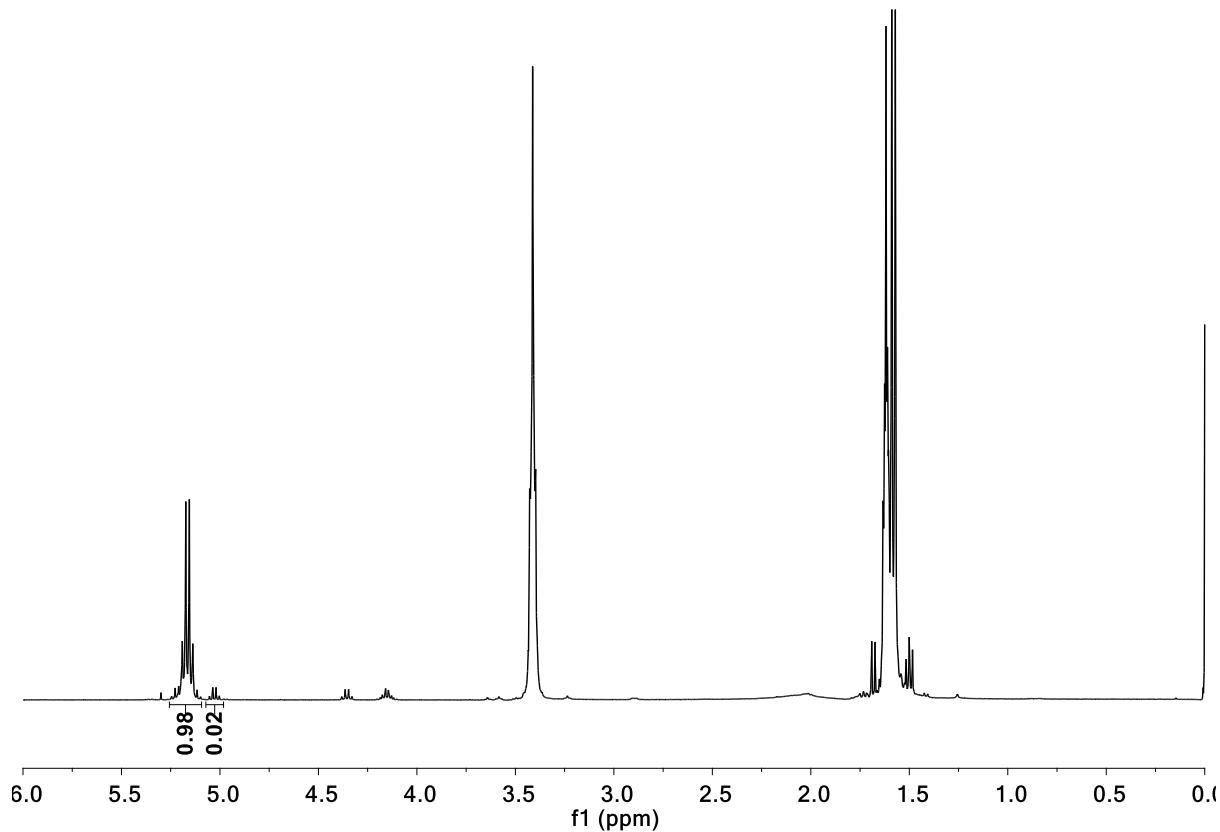

Table 2 entry 5-1

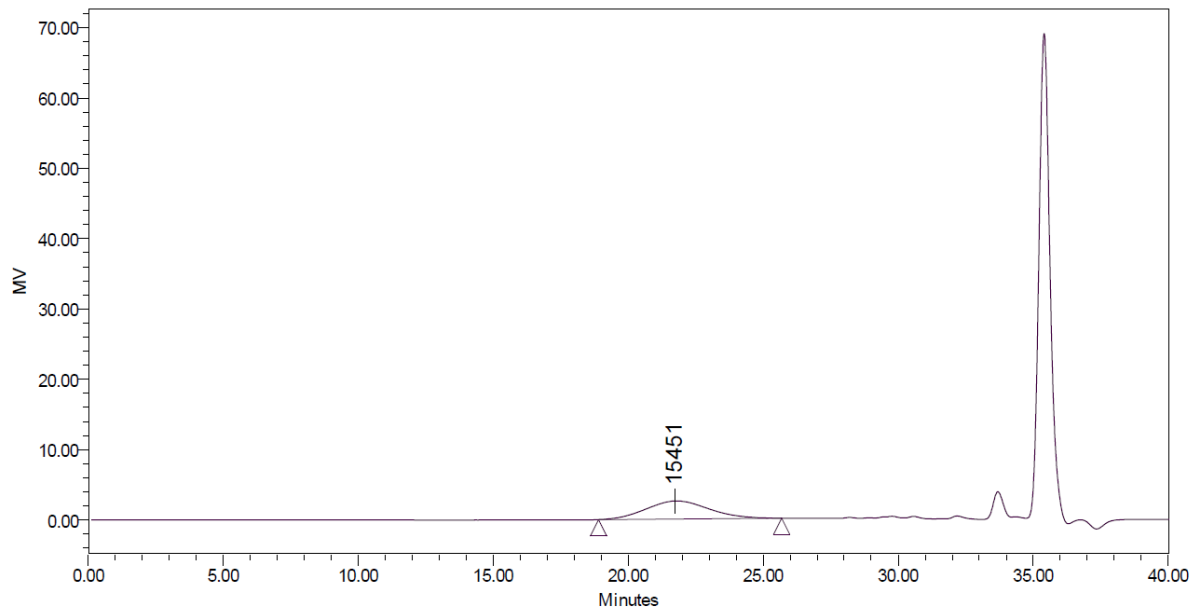

Broad Unknown Relative Peak Table

| Distribution Name | Mn (Daltons) | Mw (Daltons) | MP (Daltons) | Mz (Daltons) | Mz+ 1 (Daltons) | Polydispersity | Mz/Mw    | Mz+ 1/Mw |
|-------------------|--------------|--------------|--------------|--------------|-----------------|----------------|----------|----------|
| 1                 | 12973        | 15936        | 15451        | 19045        | 22169           | 1.228393       | 1.195037 | 1.391111 |

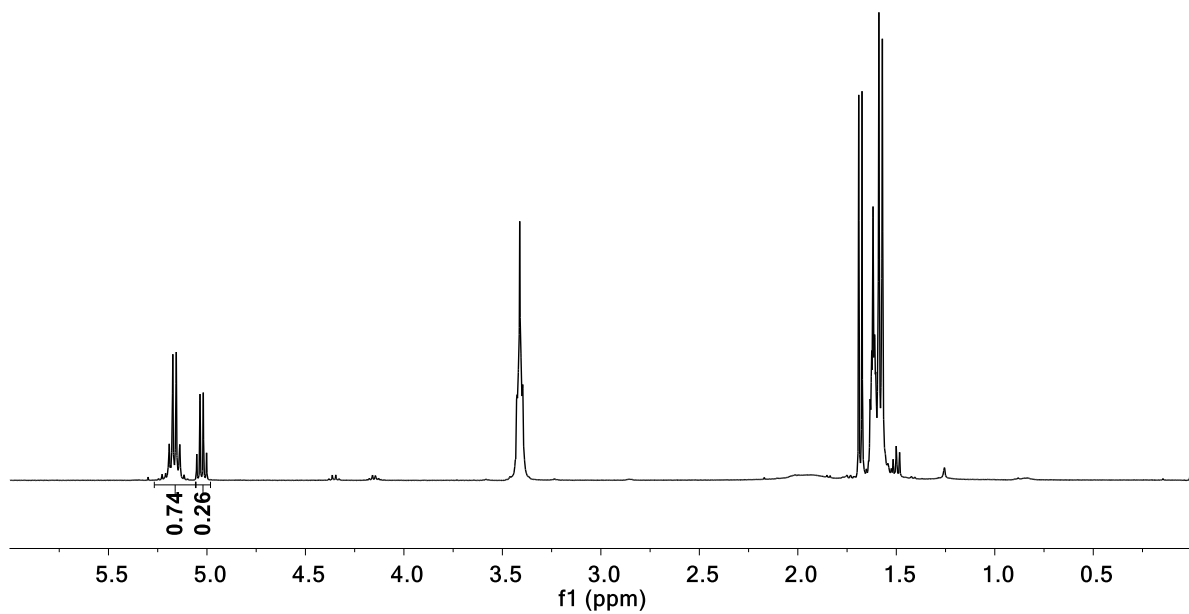

Table 2 entry 5-2

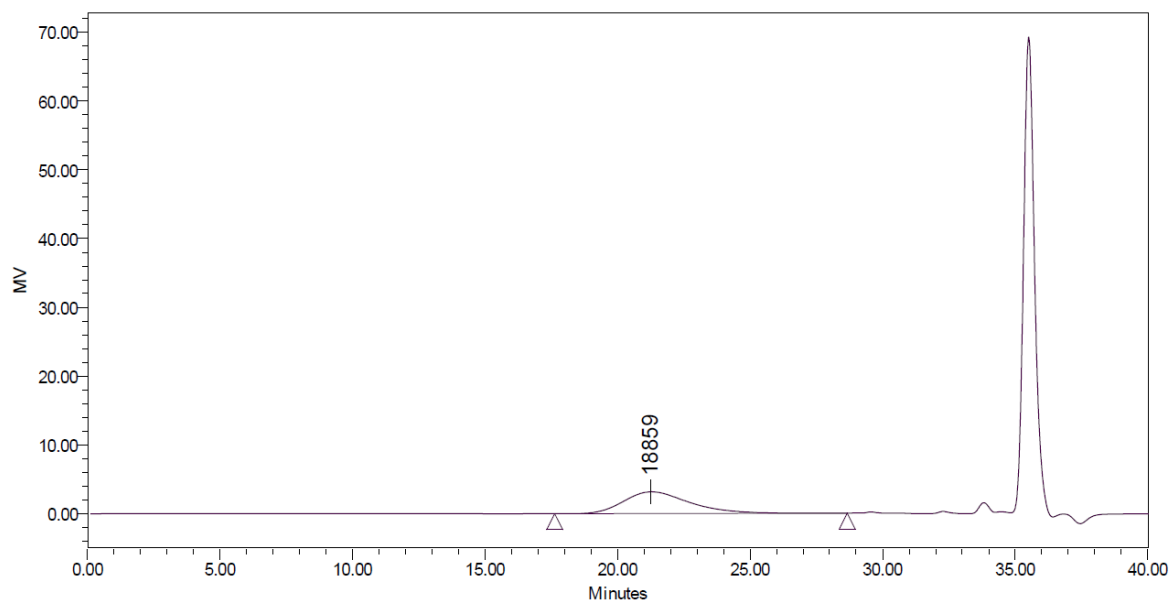

Broad Unknown Relative Peak Table

| Distribution Name | Mn (Daltons) | Mw (Daltons) | MP (Daltons) | Mz (Daltons) | Mz+1 (Daltons) | Polydispersity | Mz/Mw    | Mz+1/Mw  |
|-------------------|--------------|--------------|--------------|--------------|----------------|----------------|----------|----------|
| 1                 | 13354        | 17973        | 18859        | 22135        | 26153          | 1.345950       | 1.231542 | 1.455131 |

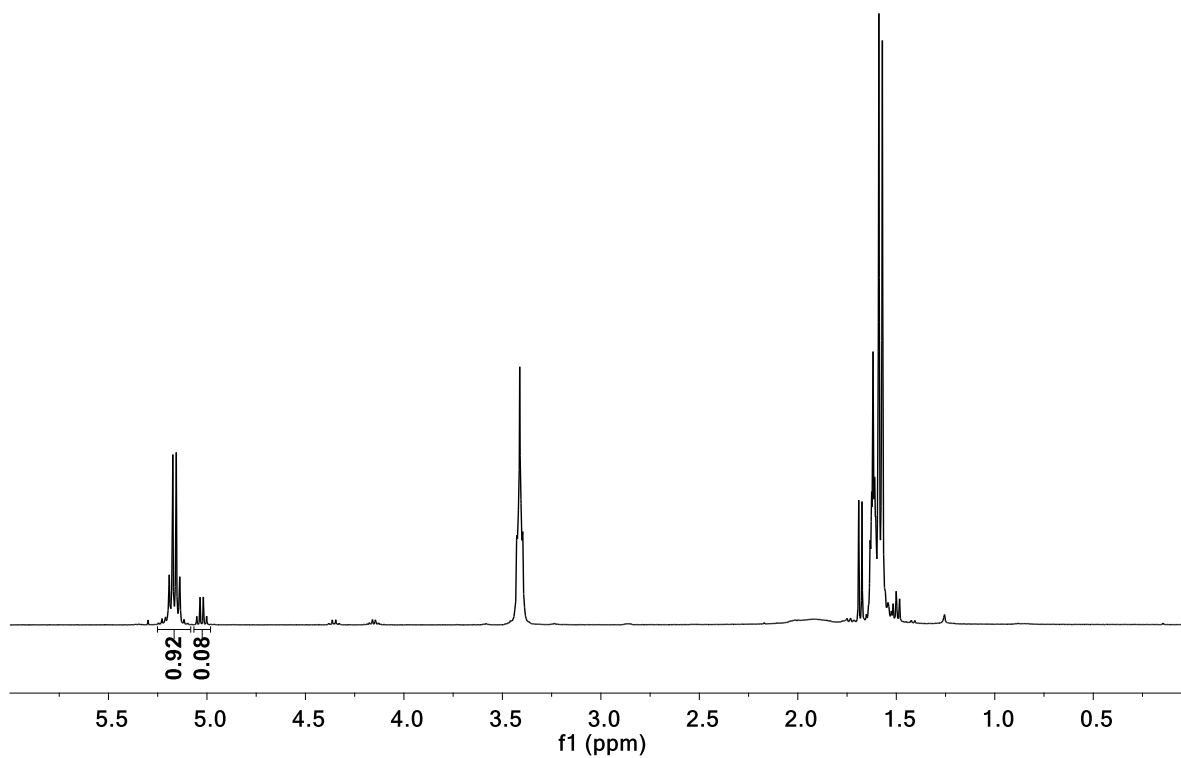

Supplement: c8py01520a1.pdf [file c8py01520a1.pdf]
